# Supplementary material for: Bone mineral density loci specific to the skull portray potential pleiotropic effects on craniosynostosis
Source: PubMed Central journal article supplement (PMC10319806; doi:10.1038/s42003-023-04869-0), 2023-07-04
Supplement: 42003_2023_4869_MOESM2_ESM.pdf [file 42003_2023_4869_MOESM2_ESM.pdf]

## Supplementary Information

### **Bone Mineral Density Loci Specific to the Skull Portray Potential Pleiotropic Effects On Craniosynostosis**

Medina-Gomez et al.

|                                     |    |
|-------------------------------------|----|
| Cohorts short description .....     | 2  |
| Supplementary acknowledgments ..... | 7  |
| Supplementary tables .....          | 13 |
| Supplementary figures.....          | 33 |
| Supplementary references.....       | 42 |

## Cohorts short description

### *Avon Longitudinal Study of Parents and their Children (ALSPAC):*

The Avon Longitudinal Study of Parents and their Children (ALSPAC) is a longitudinal population-based birth cohort that recruited pregnant women residing in Avon, UK, with an expected delivery date between 1st April 1991 and 31st December 1992. The initial number of pregnancies enrolled was 14,541. When the oldest children were approximately 7 years of age, an attempt was made to bolster the initial sample with eligible cases who had failed to join the study originally. The total sample size for analyses after the age of seven was 15,454 pregnancies, resulting in 15,589 fetuses. Of these 14,901 were alive at one year of age. The following manuscript contains the results of ALSPAC individuals who were measured on DXA at the age 9 FOCUS group and have GWAS. Ethical approval for the study was obtained from the ALSPAC Ethics and Law Committee and the Local Research Ethics Committees. Consent for biological samples has been collected in accordance with the Human Tissue Act (2004). Informed consent for use of data collected via questionnaires and clinics was obtained from participants following the recommendations of the ALSPAC Ethics and Law Committee at the time. This cohort is described in detail on the website (<http://www.alspac.bris.ac.uk>) and elsewhere<sup>1-3</sup> and the total body DXA measures and cohort analyzed in the present paper are described in Kemp et al. (2014)<sup>4</sup>. Please note that the study website contains details of all the data that is available through a fully searchable data dictionary and variable search tool (<http://www.bris.ac.uk/alspac/researchers/our-data>).

### *Bone Mineral Density in Childhood Study (BMDCS):*

The Bone Mineral Density in Childhood Study is an ongoing longitudinal study in which boys and girls aged 6-16 year old were recruited between 2002-2003, and whose DXA measurements are obtained annually at five clinical centers in the United States<sup>5,6</sup>.

### *BPROOF:*

B-PROOF is a trial investigating the effect of 2-year supplementation with 400 mcg folic acid and 500 mcg vitamin B12 on fracture incidence in hyperhomocysteinemic persons aged 65y and older. The study samples have been previously described in detail<sup>7</sup>. All participants gave informed consent and the WU Medical Ethics Committee approved the study protocol, and the Medical Ethics committees of EMC and VUmc gave approval for local feasibility.

### *Copenhagen Prospective Studies on Asthma (COPSAC) cohort:*

The Copenhagen Prospective Studies on Asthma in Childhood is a clinical study. COPSAC<sub>2000</sub> is a mother child cohort where all the mothers had a history of a doctor's diagnosis of asthma after 7 years of age and thus this is a high risk asthma cohort comprising 411 children. Newborns were enrolled in the first month of life, as previously described in detail<sup>8</sup>. COPSAC<sub>2010</sub> is a mother child cohort comprising 700 children born to unselected mothers from Denmark as described previously in detail<sup>9,10</sup>. The studies

were conducted in accordance with the guiding principles of the Declaration of Helsinki and was approved by the Local Ethics Committee (COPSAC2000: KF 01-289/96, COPSAC2010: H-B-2008-093), and the Danish Data Protection Agency (COPSAC2000 and COPSAC2010: 2015-41-3696). Both parents provided written informed consent before enrolment. The Ethics Committee for Copenhagen and the Danish Data Protection Agency approved this study.

#### *deCODE genetics BMD study:*

The deCODE genetics BMD study is an ongoing population based study of all subjects who have undergone a DEXA-Hologic bone mineral density scan at the Landspítali University Hospital, Reykjavik, Iceland. The study samples have been previously described in detail <sup>11</sup>. All participants gave informed consent and the study was approved by the Data Protection Commission of Iceland and the National Bioethics Committee of Iceland.

#### *ERF:*

Erasmus Rucphen Family study (ERF) is a family-based cohort study that includes inhabitants of a genetically isolated community in the South-West of the Netherlands, studied as part of the Genetic Research in Isolated Population (GRIP) program. ERF includes over 3,000 individuals who are living descendants of 22 couples, who had at least six children baptized in the community church, and their spouses. All data were collected between June 2002 and February 2005. The population shows minimal immigration and high inbreeding, therefore frequency of rare alleles is increased in this population. All participants gave informed consent, and the Medical Ethics Committee of the Erasmus University Medical Centre, approved the study.

#### *The Generation R Study:*

The Generation R Study is a multiethnic prospective cohort study in which 9,778 pregnant women living in Rotterdam and with delivery date from April 2002 until January 2006 were enrolled. Details of study design and data collection can be found elsewhere <sup>12</sup>. Genotype and imputation of this cohort are described elsewhere <sup>13</sup>.

#### *GOOD Study:*

The Gothenburg Osteoporosis and Obesity Determinants (GOOD) study was initiated to determine both environmental and genetic factors involved in the regulation of bone and fat mass. The GOOD study is a population-based cohort in which male subjects from between 18 and 20 years of age in the Gothenburg area in Sweden were randomly selected using national population registers and invited to participate in this initiative by phone. From the selected candidates 1,068 agreed to participate providing oral and written informed consent. The GOOD study was approved by the local ethics committee at Gothenburg University <sup>14</sup>.

### *MROS USA:*

The Osteoporotic Fractures in Men (MrOS) Study is a multi-center prospective, longitudinal, observational study of risk factors for vertebral and all non-vertebral fractures in older men, and of the sequelae of fractures in men<sup>15,16</sup>. The original specific aims of the study include: (1) to define the skeletal determinants of fracture risk in older men, (2) to define lifestyle and medical factors related to fracture risk, (3) to establish the contribution of fall frequency to fracture risk in older men, (4) to determine to what extent androgen and estrogen concentrations influence fracture risk, (5) to examine the effects of fractures on quality of life, (6) to identify sex differences in the predictors and outcomes of fracture, (7) to collect and store serum, urine and DNA for future analyses as directed by emerging evidence in the fields of aging and skeletal health, and (8) define the extent to which bone mass/fracture risk and prostate diseases are linked. The MrOS Study enrolled 5,994 community dwelling, ambulatory men aged 65 years or older from six communities in the United States (Birmingham, AL; Minneapolis, MN; Palo Alto, CA; Monongahela Valley near Pittsburgh, PA; Portland, OR; and San Diego, CA) between 2000 and 2002. Inclusion criteria were designed to provide a study cohort that is representative of the broad population of older men. The inclusion criteria were: (1) ability to walk without the assistance of another, (2) absence of bilateral hip replacements, (3) ability to provide self-reported data, (4) residence near a clinical site for the duration of the study, (5) absence of a medical condition that (in the judgment of the investigator) would result in imminent death, and (6) ability to understand and sign an informed consent. To qualify as an enrollee, the participant had to provide written informed consent, complete the self-administered questionnaire (SAQ), attend the clinic visit, and complete at least the anthropometric, DXA, and vertebral X-ray procedures. There were no other exclusion criteria. Written informed consent was obtained from all participants, and the Institutional Review Board at each study site approved the study.

Whole body total BMD (g/cm<sup>2</sup>) and head BMD (g/cm<sup>2</sup>) was measured using dual energy x-ray absorptiometry (DXA) (Hologic, Inc., MA) using Hologic QDR 4500 workstations at the baseline clinic visit. A central quality control lab, certification of DXA operators, and standardized procedures for scanning were used to insure reproducibility of DXA measurements. At baseline, a Hologic whole body phantom was circulated and measured at the 6 clinical sites. The variability across clinics was within acceptable limits, and cross-calibration correction factors were not required.

### *NEO:*

The NEO was designed for extensive phenotyping to investigate pathways that lead to obesity-related diseases. The NEO study is a population-based, prospective cohort study that includes 6,671 individuals aged 45–65 years, with an oversampling of individuals with overweight or obesity. At baseline, information on demography, lifestyle, and medical history have been collected by questionnaires. In addition, samples of 24-h urine, fasting and postprandial blood plasma and serum, and DNA were collected.

### *OPRA:*

The Osteoporosis Risk Assessment Cohort (OPRA) cohort recruited Swedish women aged 75, at which time age-related bone loss is already obvious and fractures prevalent. The study was designed to investigate genetic and lifestyle factors contributing to osteoporosis and fracture risk. Of 1604 women invited between December 1995 and May 1999, 1044 (65%) attended at baseline. No exclusion criteria were applied. All participants answered a detailed questionnaire regarding their general health; BMD and body composition was assessed by DXA. All participants gave written informed consent and the Lund University Ethics Committee approved the study.

### *ORCADES:*

The Orkney Complex Disease Study is an ongoing family-based genetic epidemiology collection in the isolated Scottish archipelago of Orkney. Genetic diversity in this population is decreased compared to Mainland Scotland, consistent with the high levels of endogamy historically. Fasting blood samples were collected and over 300 health-related phenotypes and environmental exposures were measured in each individual. All participants gave informed consent and the study was approved by Research Ethics Committees in Orkney and Aberdeen.

### *PANIC:*

The Physical Activity and Nutrition in Children (PANIC) study is a controlled physical activity and dietary intervention study in a population sample of 506 Finnish children aged 6-8 years at baseline in 2007-2009. Ethical approval was obtained from the Research Ethics Committee of the Hospital District of Northern Savo. All children and their parents gave their written informed consent <sup>17</sup>. (<http://www.uef.fi/en/web/physical-activity-and-nutrition-in-children/home>)

### *RAINE:*

The Raine (West Australian Pregnancy Cohort) Study is a longitudinal population-based pregnancy cohort study, which recruited 2,900 pregnant women from the public antenatal clinic at King Edward Memorial Hospital and surrounding private clinics in Perth, Western Australia between May 1989 and November 1991 <sup>18</sup>. Of the 2868 live births, 1183 had a whole body DXA at 20 years <sup>19</sup>.

### *Rotterdam Study:*

The Rotterdam Study is a prospective cohort study of chronic disabling conditions in Dutch elderly individuals that started in 1990 in Ommoord, a suburb of Rotterdam, among 10,994, men and women aged 55 and over <sup>20</sup>.

### *SOF:*

The Study of Osteoporotic Fractures (SOF) is a prospective multicenter study of risk factors for vertebral and non-vertebral fractures <sup>21</sup>. The cohort is comprised of 9,704 community-dwelling women 65 years

old or older recruited from populations-based listings in four U.S. areas: Baltimore, Maryland; Minneapolis, Minnesota; Portland, Oregon; and the Monongahela Valley, Pennsylvania. The SOF participants were followed up every four months by postcard or telephone to ascertain the occurrence of falls, fractures and changes in address. To date, follow-up rates have exceeded 95% for vital status and fractures. All fractures are validated by x-ray reports or, in the case of most hip fractures, a review of pre-operative radiographs. The inclusion criteria were: (1) 65 years or older, (2) ability to walk without the assistance of another, (3) absence of bilateral hip replacements, (4) ability to provide self-reported data, (5) residence near a clinical site for the duration of the study, (6) absence of a medical condition that (in the judgment of the investigator) would result in imminent death, and (7) ability to understand and sign an informed consent.

This study used whole body total BMD ( $\text{g}/\text{cm}^2$ ) and head BMD ( $\text{g}/\text{cm}^2$ ) measured using dual energy x-ray absorptiometry (DXA) (Hologic, Inc., MA) using Hologic QDR 2000 workstations at the sixth clinic visit. Scans were performed and analyzed at each clinic. Review of scans was done at the UCSF Coordinating Center on random subsets of scans and on problematic scans identified by technicians at the clinic. Some scans were deemed unacceptable and are not included in the data or are set to a special missing value code.

#### *TwinsUK:*

The UK Adult Twin Registry (TwinsUK) ([www.twinsuk.ac.uk/](http://www.twinsuk.ac.uk/)) was started in 1993 and is comprised of ~12,000 monozygotic and dizygotic twins (83% female) aged 16-85 years recruited by successive media campaigns from all over the UK without selection for any particular disease or trait. The cohort is from Northern European/UK ancestry and has been shown to be representative of singleton populations and the UK population in general (26). All twins received a series of detailed disease and environmental questionnaires and the majority have been assessed in detail clinically at several time points for several hundred phenotypes related to common diseases or intermediate traits. The primary focus of the study has been the genetic basis of healthy aging process and complex diseases, including cardiovascular, metabolic, musculoskeletal, and ophthalmologic disorders.

#### *UK-Biobank Study:*

In 2006-2010, the UK Biobank recruited 502,647 individuals aged between 37-76 years (99.5% were 40-69 years) from across the country. Each participant provided information regarding their health and lifestyle using touch screen questionnaires, physical measurements and agreement to have their health followed and they also provided blood, urine and saliva samples for future analysis. UK Biobank has ethical approval from the Northwest Multi-centre Research Ethics Committee (MREC) and informed consent was obtained from all participants.

## Supplementary acknowledgments

The authors would like to thank the many colleagues who contributed to collection and phenotypic characterization of the clinical samples, as well as genotyping and analysis of the GWAS data. Full details of acknowledgements are provided below.

### *ALSPAC Study:*

We are extremely grateful to all the families who took part in this study, the midwives for their help in recruiting them, and the whole ALSPAC team, which includes interviewers, computer and laboratory technicians, clerical workers, research scientists, volunteers, managers, receptionists, and nurses. GWAS data was generated by Sample Logistics and Genotyping Facilities at the Wellcome Trust Sanger Institute and LabCorp (Laboratory Corporation of America) using support from 23andMe. The UK Medical Research Council and the Wellcome Trust (Grant ref: 217065/Z/19/Z) and the University of Bristol provide core support for ALSPAC. This publication is the work of the authors, and JPK and DME will serve as guarantors for the contents of this paper. This work is supported by a Medical Research Council program grant (MC\_UU\_12013/4 to D.M.E). D.M.E is supported by an NHMRC Senior Research Fellowship (APP1137714). J.P.K is funded by a National Health and Medical Research Council (Australia) Investigator grant (GNT1177938)

### *The Bone Mineral Density in Childhood Study:*

BMDCS is extremely grateful to all the families who participated in this study, and the whole team, which includes interviewers, computer and laboratory technicians, clerical workers, research scientists, volunteers, managers, receptionists, and nurses. This work was funded by the National Institute of Child Health and Human Development (NICHD) contracts NO1-HD-1-3228, -3329, -3330, -3331, -3332 and -3333, R01 HD058886 and the Clinical and Translational Research Center (5-MO1-RR-000240 and UL1 RR-026314).

### *BPROOF:*

The authors gratefully thank all study participants, and all co-workers who helped to succeed this trial, especially P.H. in 't Veld, M. Hillen-Tijdink, A. Nicolaas-Merkus, N. Pliester, S. Oliai Araghi, and S. Smits. They also thank Prof. Dr. H.A.P. Pols for obtaining funding. B-PROOF is supported and funded by The Netherlands Organization for Health Research and Development (ZonMw, Grant 6130.0031), The Hague; unrestricted grant from NZO (Dutch Dairy Association), Zoetermeer; NCHA (Netherlands Consortium Healthy Ageing) Leiden/ Rotterdam; Ministry of Economic Affairs, Agriculture and Innovation (project KB-15-004-003), the Hague; Wageningen University, Wageningen; VU University Medical Center, Amsterdam; Erasmus MC, Rotterdam.

### *CHS:*

Cardiovascular Health Study: This CHS research was supported by NHLBI contracts HHSN268201200036C, HHSN268200800007C, N01HC55222, N01HC85079, N01HC85080, N01HC85081, N01HC85082, N01HC85083, N01HC85086; and NHLBI grants U01HL080295, R01HL087652, R01HL105756, R01HL103612, R01HL120393, and R01HL130114 with additional contribution from the National Institute of Neurological Disorders and Stroke (NINDS). Additional support was provided through R01AG023629 from the National Institute on Aging (NIA). A full list of principal CHS investigators and institutions can be found at CHS-NHLBI.org. The provision of genotyping data was supported in part by the National Center for Advancing Translational Sciences, CTSI grant UL1TR000124, and the National Institute of Diabetes and Digestive and Kidney Disease Diabetes Research Center (DRC) grant DK063491 to the Southern California Diabetes Endocrinology Research Center. The content is solely the responsibility of the authors and does not necessarily represent the official views of the National Institutes of Health.

### *COPSAC:*

We express our gratitude to the participants of the COPSAC2000, COPSAC2010 and COPSAC-REGISTRY cohort study for all their support and commitment. We also acknowledge and appreciate the unique efforts of the COPSAC research team.

### *deCODE:*

We thank all the study participants their participation, the staff at deCODE genetics core facilities and the staff at the Research Service Center. deCODE genetics funded the study.

### *ERF:*

We are grateful to all study participants and their relatives, general practitioners and neurologists for their contributions and to P. Veraart for her help in genealogy, J. Vergeer for the supervision of the laboratory work and P. Snijders for his help in data collection. Erasmus Rucphen family study: The ERF study as a part of EUROSPAN (European Special Populations Research Network) was supported by European Commission FP6 STRP grant number 018947 (LSHG-CT-2006-01947) and also received funding from the European Community's Seventh Framework Programme (FP7/2007-2013)/grant agreement HEALTH-F4-2007-201413 by the European Commission under the programme "Quality of Life and Management of the Living Resources" of 5th Framework Programme (no. QLG2-CT-2002-01254). High-throughput analysis of the ERF data was supported by a joint grant from the Netherlands Organization for Scientific Research and the Russian Foundation for Basic Research (NWO-RFBR 047.017.043). Exome sequencing analysis in ERF was supported by the ZonMw grant (project 91111025). Najaf Amin is supported by the Netherlands Brain Foundation (project number F2013(1)-28).

### *The Generation R Study:*

We gratefully acknowledge the contribution of children and parents, general practitioners, hospitals, midwives and pharmacies in Rotterdam. The generation and management of GWAS genotype data for the Generation R Study was done at the Genetic Laboratory of the Department of Internal Medicine,



Erasmus MC, The Netherlands. We thank Pascal Arp, Mila Jhamai, Marijn Verkerk, Lizbeth Herrera and Marjolein Peters for their help in creating, managing and QC of the GWAS database. The musculoskeletal research of the Generation R Study is partly supported by the European Commission grant HEALTH-F2-2008-201865-GEFOS. The general design of Generation R Study is made possible by financial support from Erasmus MC, University Medical Center Rotterdam, Rotterdam, Rotterdam, Erasmus University Rotterdam, the Netherlands Organization for Health Research and Development (ZonMw), the Netherlands Organisation for Scientific Research (NWO), the Ministry of Health, Welfare and Sport and the Ministry of Youth and Families. Additionally, the Netherlands Organization for Health Research and Development supported authors of this manuscript (ZonMw 907.00303, ZonMw 916.10159). F.R is funded by the LEGENDARE ERC Grant (ERC-2020-ADG).

#### *GOOD Study:*

Financial support was received from the Swedish Research Council (K2010- 54X-09894-19-3, 2006-3832 and K2010-52X-20229-05-3), the Swedish Foundation for Strategic Research, the ALF/LUA research grant in Gothenburg, the Lundberg Foundation, the Torsten and Ragnar Söderberg's Foundation, the Västra Götaland Foundation, the Göteborg Medical Society, the Novo Nordisk foundation, and the European Commission grant HEALTH-F2-2008-201865-GEFOS.

#### *MROS-USA:*

The Osteoporotic Fractures in Men (MrOS) Study is supported by National Institutes of Health funding. The following institutes provide support: The National Institute on Aging (NIA), the National Institute of Arthritis and Musculoskeletal and Skin Diseases (NIAMS), the National Center for Advancing Translational Sciences (NCATS), and NIH Roadmap for Medical Research under the following grant numbers: U01 AG027810, U01 AG042124, U01 AG042139, U01 AG042140, U01 AG042143, U01 AG042145, U01 AG042168, U01 AR066160, and UL1 TR000128. NIAMS provided funding for the MrOS ancillary study 'Replication of candidate gene associations and bone strength phenotype in MrOS' under the grant number R01 AR051124 and the MrOS ancillary study 'GWAS in MrOS and SOF' under the grant number RC2 AR058973.

#### *NEO:*

The authors of the NEO study thank all individuals who participated in the Netherlands Epidemiology in Obesity study, all participating general practitioners for inviting eligible participants and all research nurses for collection of the data. We thank the NEO study group, Pat van Beelen, Petra Noordijk and Ingeborg de Jonge for the coordination, lab and data management of the NEO study. The genotyping in the NEO study was supported by the Centre National de Génotypage (Paris, France), headed by Jean-Francois Deleuze. The NEO study is supported by the participating Departments, the Division and the Board of Directors of the Leiden University Medical Center, and by the Leiden University, Research Profile Area Vascular and Regenerative Medicine. Dennis Mook-Kanamori is supported by Dutch Science Organization (ZonMW-VENI Grant 916.14.023).

#### *OPRA:*

This work was supported by grants from the Swedish Research Council (K2015-52X-14691-13-4), Forte (Grant 2007–2125), Greta and Johan Kock Foundation, A. Pålsson Foundation, A. Osterlund Foundation, H Järnhardt foundation, King Gustav V 80 year fund, King Gustav V and Queen Victoria Foundation, Åke Wiberg Foundation, Thelma Zoegas Foundation, Swedish Rheumatism foundation, Skåne University Hospital Research Fund and the Research and Development Council of Region Skåne, Sweden.

Thanks are extended to the research nurses at the Clinical and Molecular Osteoporosis Research Unit, Malmö; Åsa Almgren for data management, Olle Melander for GWAS genotyping (performed at Lund University, Dept of Clinical Sciences Malmö, Sweden) and to all the women who kindly participated in the study.

### *ORCADES:*

ORCADES was supported by the Chief Scientist Office of the Scottish Government (CZB/4/276, CZB/4/710), the Royal Society, the MRC Human Genetics Unit, Arthritis Research UK and the European Union framework program 6 EUROSPAN project (contract no. LSHG-CT-2006-018947). DNA extractions were performed at the Wellcome Trust Clinical Research Facility in Edinburgh. We would like to acknowledge the invaluable contributions of the research nurses in Orkney, the administrative team in Edinburgh and the people of Orkney.

### *PANIC:*

We are grateful to the parents and children for participating in the PANIC study and to the whole research team for their contribution in carrying out the study. The PANIC study was financially supported by grants from Ministry of Social Affairs and Health of Finland, Ministry of Education and Culture of Finland, Finnish Innovation Fund Sitra, Social Insurance Institution of Finland, Finnish Cultural Foundation, Juha Vainio Foundation, Foundation for Pediatric Research, Paavo Nurmi Foundation, Paulo Foundation, Diabetes Research Foundation, Yrjo Jahnsson Foundation, Finnish Foundation for Cardiovascular Research, State Research Funding from Research Committee of Kuopio University Hospital Catchment Area, Kuopio University Hospital EVO Funding, National Doctoral Programs, and the City of Kuopio.

### *RAINE:*

We thank the Raine Study participants and families for being part of the study, the Raine Study Team for cohort management and data collection. The Raine Study receives core funding support from the University of Western Australia -Faculty of Medicine, Dentistry and Health Sciences, Curtin University, the Raine Medical Research Foundation, the Women and Infants Research Foundation, Telethon Kids Institute and Edith Cowan University. The study was funded by the National Health and Medical Research Council of Australia [grant numbers 572613, 403981 and 003209], the Canadian Institutes of Health Research [grant number MOP-82893] and the Lions Eye Institute in WA. This work was supported by resources provided by the Pawsey Supercomputing Centre with funding from the Australian Government and the Government of Western Australia.

### *Rotterdam Study:*

The generation and management of GWAS genotype data for the Rotterdam Study (RS I, RS II, RS III) was executed by the Human Genotyping Facility of the Genetic Laboratory of the Department of Internal Medicine, Erasmus MC, Rotterdam, The Netherlands. The GWAS datasets are supported by the Netherlands Organisation of Scientific Research NWO Investments (nr. 175.010.2005.011, 911-03-012), the Genetic Laboratory of the Department of Internal Medicine, Erasmus MC, the Research Institute for Diseases in the Elderly (014-93-015; RIDE2), the Netherlands Genomics Initiative (NGI)/Netherlands Organisation for Scientific Research (NWO) Netherlands Consortium for Healthy Aging (NCHA), project nr. 050-060-810. We thank Pascal Arp, Mila Jhamai, Marijn Verkerk, Lizbeth Herrera and Marjolein Peters, PhD, and Carolina Medina-Gomez, MSc, for their help in creating the GWAS database, and Karol Estrada, PhD, Yurii Aulchenko, PhD, and Carolina Medina-Gomez, PhD, for the creation and analysis of imputed data. Dr. Fernando Rivadeneira received an additional grant from the Netherlands Organization for Health Research and Development ZonMw VIDI 016.136.367. The Rotterdam Study is funded by Erasmus Medical Center and Erasmus University, Rotterdam, Netherlands Organization for the Health Research and Development (ZonMw), the Research Institute for Diseases in the Elderly (RIDE), the Ministry of Education, Culture and Science, the Ministry for Health, Welfare and Sports, the European Commission (DG XII), and the Municipality of Rotterdam. The authors are very grateful to the study participants, the staff from the Rotterdam Study (particularly L. Buist and J.H. van den Boogert) and the participating general practitioners and pharmacists.

### *SOF:*

The Study of Osteoporotic Fractures (SOF) is supported by National Institutes of Health funding. The National Institute on Aging (NIA) provides support under the following grant numbers: R01 AG005407, R01 AR35582, R01 AR35583, R01 AR35584, R01 AG005394, R01 AG027574, and R01 AG027576. The National Institute of Arthritis and Musculoskeletal and Skin Diseases (NIAMS) provides funding for the SOF ancillary study 'GWAS in MrOS and SOF' under the grant number RC2AR058973.

### *Twins UK:*

We gratefully acknowledge the help and support of the twin volunteers. TwinsUK is funded by the Wellcome Trust, Medical Research Council, European Union, the National Institute for Health Research (NIHR)-funded BioResource, Clinical Research Facility and Biomedical Research Centre based at Guy's and St Thomas' NHS Foundation Trust in partnership with King's College London. TDS is holder of an ERC Advanced Principal Investigator award. SNP Genotyping was performed by The Wellcome Trust Sanger Institute and National Eye Institute via NIH/CIDR for TwinsUK. The study also received support from the Australian National Health and Medical Research Council (Project Grant 1048216) and The Pawsey Supercomputing Centre (with Funding from the Australian Government and the Government of Western Australia; PG 16/0162, PG 17/director2025).

### *Functional Group:*

C. Ackert-Bicknell is supported by the National Institute of Health /National Institute of Arthritis Musculoskeletal and Skin Diseases grant number AR060981. E. Krague is supported by Versus Arthritis, grant #21937.

## Supplementary tables

**Supplementary Table 1. Independent SNPs associated with SK-BMD. Genomic coordinates are on build 37 of the human genome. Craniosynostosis (CS).** Beta coefficients and allele frequencies (EAF) are reported for the A1 allele. Jsufix refers to the summary statistics in the join analysis fitting all SNPs together. Var. exp.=  $2\beta \times \text{EAF} \times (1-\text{EAF})^{22}$ . SK=skull BMD, assessed in this study; LS=lumbar spine BMD (Zheng et al.<sup>23</sup>); FN=Femoral Neck BMD (Zheng et al.<sup>23</sup>); eBMD = heel BMD (Morris et al.<sup>24</sup>).

| Marker Description |           |         |                 |              |              |    |      | Skull BMD |          |        |          |                 | FN-BMD  |        | LS-BMD   |        | e-BMD     |           |           |
|--------------------|-----------|---------|-----------------|--------------|--------------|----|------|-----------|----------|--------|----------|-----------------|---------|--------|----------|--------|-----------|-----------|-----------|
| CHR                | BP        | locus   | CS-gene present | closest_gene | rsnumber     | A1 | EAF  | beta      | P        | betaJ  | PJ       | locus var. exp. | beta_FN | P_FN   | beta_LS  | P_LS   | beta_eBMD | P_eBMD    |           |
| 1                  | 22451845  | 1p36.12 | no              | WNT4         | rs7526484    | T  | 0.24 | 0.075     | 1.47E-19 | 0.057  | 1.89E-11 | 1               | 0.0021  | 0.026  | 0.004    | 0.018  | 0.094     | 0.022     | 3.00E-25  |
| 1                  | 22484575  | 1p36.12 | no              | WNT4         | rs3971300    | T  | 0.71 | 0.109     | 5.70E-43 | 0.101  | 3.26E-36 | 1               | 0.0048  | 0.041  | 3.27E-06 | 0.039  | 1.44E-04  | 0.039     | 4.10E-88  |
| 1                  | 22692315  | 1p36.12 | no              | ZBTB40       | rs12728589   | C  | 0.18 | 0.088     | 1.30E-21 | 0.091  | 7.14E-23 | 1               | 0.0023  | 0.082  | 3.04E-16 | 0.090  | 3.41E-14  | 0.061     | 5.80E-150 |
| 1                  | 68634642  | 1p31.3  | no              | WLS          | rs12132335   | A  | 0.14 | -0.059    | 5.50E-09 | -0.074 | 4.62E-13 | 2               | 0.0008  | -0.029 | 0.008    | -0.003 | 0.796     | -0.006    | 0.035     |
| 1                  | 68656697  | 1p31.3  | no              | WLS          | rs2566752    | T  | 0.62 | -0.063    | 2.67E-18 | -0.072 | 3.50E-22 | 2               | 0.0019  | -0.062 | 3.65E-15 | -0.083 | 1.49E-19  | -0.036    | 1.30E-78  |
| 1                  | 110475552 | 1p13.3  | no              | CSF1         | rs12132533   | A  | 0.80 | 0.049     | 1.88E-08 | 0.048  | 2.82E-08 | 3               | 0.0008  | 0.022  | 0.017    | 0.022  | 0.041     | 0.008     | 0.007     |
| 1                  | 113147607 | 1p13.2  | no              | ST7L         | rs55652172** | A  | 0.20 | 0.050     | 1.34E-08 | 0.050  | 1.85E-08 | 4               | 0.0008  | 0.041  | 1.33E-05 | 0.034  | 0.002     | 0.032     | 4.60E-46  |
| 1                  | 163875519 | 1q23.3  | no              | LOC100422212 | rs7550321**  | A  | 0.44 | -0.042    | 1.30E-09 | -0.042 | 1.67E-09 | 5               | 0.0009  | -0.005 | 0.534    | -0.030 | 0.001     | -0.018    | 6.20E-24  |
| 1                  | 172122809 | 1q24.3  | no              | DNM3         | rs495590     | C  | 0.54 | 0.042     | 7.52E-09 | 0.041  | 8.40E-09 | 6               | 0.0009  | 0.025  | 0.001    | 0.017  | 0.062     | 0.020     | 1.50E-29  |
| 1                  | 220129357 | 1q41    | no              | SLC30A10     | rs2795312    | T  | 0.65 | 0.050     | 3.06E-10 | 0.050  | 2.73E-10 | 7               | 0.0011  | 0.017  | 0.033    | 0.013  | 0.153     | 0.015     | 1.60E-16  |
| 2                  | 40630678  | 2p22.1  | no              | SLC8A1       | rs10490046   | A  | 0.77 | 0.064     | 1.20E-14 | 0.064  | 1.07E-14 | 8               | 0.0015  | 0.021  | 0.025    | 0.015  | 0.162     | 0.029     | 2.00E-40  |
| 2                  | 85498783  | 2q14.2  | no              | TCF7L1       | rs11675489   | A  | 0.54 | 0.040     | 1.63E-08 | 0.040  | 1.56E-08 | 9               | 0.0008  | 0.015  | 0.050    | 0.023  | 0.011     | 0.013     | 6.20E-12  |
| 2                  | 119104991 | 2p11.2  | no              | INSIG2       | rs72962911   | A  | 0.86 | -0.059    | 7.26E-09 | -0.058 | 1.26E-08 | 10              | 0.0008  | 0.007  | 0.558    | -0.047 | 3.68E-04  | -0.048    | 1.10E-73  |
| 2                  | 119621910 | 2p11.2  | yes             | EN1          | rs11679232   | T  | 0.28 | 0.055     | 2.02E-10 | 0.054  | 2.95E-10 | 10              | 0.0012  | 0.002  | 0.910    | 0.035  | 0.067     | 0.048     | 4.20E-129 |
| 3                  | 41138172  | 3p22.1  | no              | CTNNB1       | rs428510     | T  | 0.56 | 0.046     | 8.56E-11 | 0.046  | 1.13E-10 | 11              | 0.0010  | 0.061  | 2.44E-15 | 0.055  | 8.02E-10  | 0.046     | 3.50E-146 |
| 3                  | 147163978 | 3q24    | yes             | ZIC1         | rs12107945*  | A  | 0.30 | -0.049    | 1.37E-10 | -0.049 | 1.20E-10 | 12              | 0.0010  | -0.001 | 0.903    | -0.016 | 0.097     | -2.39E-04 | 0.730     |
| 3                  | 156692207 | 3q25.31 | no              | LEKR1        | rs74394007   | A  | 0.86 | 0.062     | 1.59E-09 | 0.062  | 1.69E-09 | 13              | 0.0009  | 0.034  | 0.003    | 0.043  | 0.001     | 0.046     | 8.90E-63  |
| 4                  | 994414    | 4p16.3  | yes             | IDUA         | rs3755955    | A  | 0.16 | -0.062    | 1.26E-10 | -0.062 | 1.27E-10 | 14              | 0.0010  | -0.044 | 2.87E-05 | -0.049 | 5.05E-05  | -0.068    | 1.90E-167 |
| 4                  | 88831249  | 4q22.1  | no              | MEPE         | rs11934731   | A  | 0.68 | -0.069    | 3.87E-20 | -0.069 | 3.02E-20 | 15              | 0.0021  | -0.035 | 1.97E-05 | -0.048 | 5.02E-07  | -0.036    | 6.10E-74  |
| 5                  | 72618265  | 5q13.2  | no              | FOXD1        | rs11948073** | A  | 0.53 | -0.048    | 3.86E-11 | -0.048 | 4.28E-11 | 16              | 0.0011  | 0.000  | 0.999    | -0.022 | 0.014     | -0.015    | 1.40E-17  |
| 5                  | 112188456 | 5q22.2  | no              | REEP5        | rs454968     | T  | 0.36 | 0.047     | 1.66E-10 | 0.047  | 1.53E-10 | 17              | 0.0010  | 0.010  | 0.235    | 0.006  | 0.507     | 0.013     | 1.20E-11  |
| 5                  | 122860170 | 5q23.2  | no              | CSNK1G3      | rs9327301    | A  | 0.26 | -0.061    | 4.47E-14 | -0.061 | 4.32E-14 | 18              | 0.0014  | -0.025 | 0.005    | -0.009 | 0.357     | -0.024    | 1.80E-30  |
| 6                  | 6939532   | 6p25.1  | no              | RREB1        | rs2490298**  | A  | 0.61 | 0.042     | 7.12E-09 | 0.042  | 8.85E-09 | 19              | 0.0008  | -0.006 | 0.476    | -0.005 | 0.611     | 0.004     | 0.011     |
| 6                  | 44943982  | 6p21.1  | yes             | SUPT3H       | rs17423748   | T  | 0.72 | 0.056     | 3.00E-12 | 0.056  | 2.99E-12 | 20              | 0.0013  | 0.004  | 0.670    | 0.028  | 0.004     | 0.012     | 6.60E-08  |
| 6                  | 53617914  | 6p12.1  | no              | LRRC1        | rs10456165** | A  | 0.22 | 0.057     | 3.45E-11 | 0.057  | 3.69E-11 | 21              | 0.0011  | 0.006  | 0.528    | 0.023  | 0.034     | -0.008    | 9.00E-05  |
| 6                  | 74458737  | 6q13    | no              | CD109        | rs9447004**  | A  | 0.50 | 0.039     | 4.61E-08 | 0.039  | 4.49E-08 | 22              | 0.0008  | 0.002  | 0.765    | 0.008  | 0.375     | 0.024     | 2.10E-42  |
| 6                  | 127047776 | 6q22.33 | no              | CENPW        | rs1101560    | A  | 0.26 | 0.063     | 5.76E-15 | 0.068  | 7.91E-17 | 23              | 0.0015  | 0.007  | 0.420    | 0.011  | 0.301     | -0.019    | 6.00E-23  |
| 6                  | 127178839 | 6q22.33 | no              | CENPW        | rs113622822  | T  | 0.04 | 0.139     | 2.61E-11 | 0.133  | 4.49E-10 | 23              | 0.0014  | 0.037  | 0.113    | 0.033  | 0.222     | 0.034     | 8.00E-10  |
| 6                  | 127425630 | 6q22.33 | no              | RSPO3        | rs1963689    | T  | 0.74 | -0.069    | 1.81E-17 | -0.055 | 3.69E-11 | 23              | 0.0018  | -0.023 | 0.009    | -0.027 | 0.008     | -0.050    | 4.00E-130 |
| 6                  | 130348257 | 6q23.1  | no              | L3MBTL3      | rs75191738** | T  | 0.14 | -0.059    | 5.80E-08 | -0.061 | 1.30E-08 | 24              | 0.0008  | 0.021  | 0.055    | -0.003 | 0.825     | 0.022     | 2.50E-19  |
| 6                  | 133366810 | 6q23.2  | no              | LINC00326    | rs13204469   | A  | 0.68 | 0.109     | 2.02E-46 | 0.087  | 9.63E-26 | 25              | 0.0051  | -0.023 | 0.006    | -0.020 | 0.037     | -0.038    | 4.50E-85  |
| 6                  | 133641473 | 6q23.2  | no              | EYA4         | rs11759873   | A  | 0.65 | 0.089     | 5.85E-33 | 0.056  | 4.42E-12 | 25              | 0.0036  | 0.005  | 0.492    | -0.009 | 0.324     | -0.036    | 4.00E-83  |
| 6                  | 151874122 | 6q25.1  | no              | CCDC170      | rs9478217    | A  | 0.43 | -0.049    | 3.23E-11 | -0.049 | 2.85E-11 | 26              | 0.0012  | -0.053 | 1.23E-11 | -0.056 | 8.03E-10  | -0.071    | 7.0E-328  |

| Marker Description |           |          |                 |              |              |    |      | Skull BMD |           |        |          |                 | FN-BMD   |        | LS-BMD   |        | e-BMD     |        |            |
|--------------------|-----------|----------|-----------------|--------------|--------------|----|------|-----------|-----------|--------|----------|-----------------|----------|--------|----------|--------|-----------|--------|------------|
| CHR                | BP        | locus    | CS-gene present | closest_gene | rsnumber     | A1 | EAF  | beta      | P         | betaJ  | PJ       | locus var. exp. | beta_FN  | P_FN   | beta_LS  | P_LS   | beta_eBMD | P_eBMD |            |
| 7                  | 96121636  | 7q21.3   | no              | C7orf76      | rs4383904    | T  | 0.33 | -0.046    | 1.91E-09  | -0.046 | 2.00E-09 | 27              | 0.0009   | -0.063 | 4.6E-15  | -0.059 | 6.45E-10  | -0.045 | 3.80E-132  |
| 7                  | 120790559 | 7q31.31  | no              | CPED1        | rs56335989   | T  | 0.56 | -0.059    | 4.44E-16  | -0.051 | 1.54E-08 | 28              | 0.0017   | -0.017 | 0.032    | -0.009 | 0.316     | 0.052  | 1.10E-178  |
| 7                  | 120873438 | 7q31.31  | no              | CPED1        | rs6965195    | A  | 0.37 | -0.095    | 1.17E-37  | -0.099 | 2.12E-27 | 28              | 0.0043   | -0.016 | 0.048    | -0.018 | 0.056     | 0.067  | 9.70E-291  |
| 7                  | 120969769 | 7q31.31  | no              | WNT16        | rs2908004    | A  | 0.44 | 0.115     | 3.07E-57  | 0.080  | 3.72E-16 | 28              | 0.0065   | 0.045  | 1.71E-09 | 0.039  | 7.390E-06 | 0.095  | 2.10E-592  |
| 7                  | 120977734 | 7q31.31  | no              | WNT16        | rs55963900   | A  | 0.27 | 0.130     | 1.95E-59  | 0.110  | 7.63E-25 | 28              | 0.0066   | 0.053  | 3.7E-10  | 0.073  | 2.09E-13  | 0.162  | 6.30E-1408 |
| 8                  | 103919090 | 8q22.3   | no              | ATP6v1C1/AZI | rs11993347*  | T  | 0.77 | 0.059     | 2.67E-12  | 0.059  | 2.47E-12 | 29              | 0.0012   | 0.003  | 0.721    | 0.028  | 0.007     | 0.004  | 0.025      |
| 8                  | 109396911 | 8q23.1   | no              | EMC2         | rs10108399** | T  | 0.35 | 0.044     | 3.78E-09  | 0.044  | 3.60E-09 | 30              | 0.0009   | 0.003  | 0.677    | 0.014  | 0.139     | 0.010  | 6.70E-09   |
| 8                  | 120008587 | 8q24.12  | no              | COLEC10      | rs7842942    | T  | 0.42 | 0.079     | 5.36E-28  | 0.079  | 3.84E-28 | 31              | 0.0031   | 0.059  | 5.31E-14 | 0.080  | 7.62E-19  | 0.011  | 3.00E-10   |
| 10                 | 54427825  | 10q21.1  | no              | MBL2         | rs1373004    | T  | 0.12 | -0.092    | 6.42E-17  | -0.092 | 8.73E-17 | 32              | 0.0018   | -0.045 | 2.81E-04 | -0.056 | 1.10E-04  | -0.129 | 2.6E-433   |
| 10                 | 132252499 | 10q26.3  | no              | GLRX3        | rs61863293*# | A  | 0.35 | -0.046    | 2.80E-08  | -0.046 | 3.24E-08 | 33              | 0.0010   | -0.004 | 0.637    | -0.013 | 0.221     | 0.002  | 0.160      |
| 11                 | 259575    | 11p15.5  | no              | PSMD13       | rs56257551   | T  | 0.11 | 0.078     | 4.47E-10  | 0.078  | 4.70E-10 | 34              | 0.0012   | 0.032  | 0.016    | 0.035  | 0.023     | -0.001 | 0.650      |
| 11                 | 15903307  | 11p15.2  | yes             | SOX6         | rs1440705    | A  | 0.29 | 0.049     | 9.11E-10  | 0.049  | 8.42E-10 | 35              | 0.0010   | 0.022  | 0.009    | 0.029  | 0.004     | 0.012  | 1.80E-08   |
| 11                 | 27280398  | 11p14.1  | no              | CCDC34       | rs1351176    | T  | 0.23 | -0.035    | 3.50E-05  | 0.059  | 3.19E-09 | 36              | 0.0004   | 0.006  | 0.477    | -0.015 | 0.154     | -0.018 | 3.80E-16   |
| 11                 | 27322158  | 11p14.1  | no              | CCDC34       | rs10742173   | C  | 0.60 | -0.097    | 7.78E-41  | -0.110 | 6.60E-38 | 36              | 0.0045   | -0.014 | 0.079    | -0.020 | 0.030     | -0.045 | 7.30E-133  |
| 11                 | 27367731  | 11p14.1  | no              | CCDC34       | rs11029963   | T  | 0.66 | -0.026    | 0.0003961 | -0.057 | 7.05E-13 | 36              | 0.0003   | -0.022 | 0.007    | -0.017 | 0.065     | -0.014 | 1.60E-14   |
| 11                 | 27463564  | 11p14.1  | no              | LGR4         | rs11030009   | A  | 0.49 | 0.122     | 9.32E-66  | 0.111  | 1.40E-52 | 36              | 0.0074   | 0.008  | 0.330    | 0.030  | 9.71E-04  | 0.021  | 1.50E-33   |
| 11                 | 35083633  | 11p13    | no              | CD44         | rs2553773    | C  | 0.43 | -0.041    | 1.07E-08  | -0.044 | 4.23E-10 | 37              | 0.0008   | -0.015 | 0.054    | -0.015 | 0.101     | -0.028 | 3.20E-54   |
| 11                 | 46815633  | 11p11.2  | no              | LRP4         | rs4506602    | T  | 0.51 | -0.058    | 2.22E-16  | -0.058 | 3.26E-16 | 38              | 0.0017   | -0.027 | 4.58E-04 | -0.030 | 0.001     | -0.021 | 1.80E-33   |
| 11                 | 68218290  | 11q13.2  | yes             | LRP5         | rs11228240   | T  | 0.26 | -0.104    | 5.39E-36  | -0.104 | 3.70E-36 | 39              | 0.0042   | -0.043 | 7.22E-07 | -0.075 | 1.58E-13  | -0.043 | 6.60E-101  |
| 11                 | 121917163 | 11q23.3  | no              | BLID         | rs1944461    | T  | 0.60 | 0.039     | 3.03E-08  | 0.039  | 3.14E-08 | 40              | 0.0007   | 0.014  | 0.087    | 0.023  | 0.014     | 0.010  | 3.60E-08   |
| 12                 | 28716044  | 12p11.22 | no              | CCDC91       | rs10843202** | T  | 0.24 | -0.064    | 1.71E-14  | -0.064 | 1.89E-14 | 41              | 0.0015   | 0.026  | 0.004    | -0.006 | 0.590     | 0.022  | 9.60E-26   |
| 12                 | 49224108  | 12q13.12 | yes             | DDX23        | rs11551274   | C  | 0.03 | -0.173    | 4.41E-17  | -0.404 | 3.51E-35 | 42              | 0.0018   | -0.019 | 0.392    | -0.093 | 4.50E-04  | -0.095 | 9.10E-76   |
| 12                 | 49248340  | 12q13.12 | yes             | ADCY6        | rs143348825  | A  | 0.02 | -0.037    | 0.1828    | 0.392  | 3.53E-19 | 42              | 4.63E-05 | 0.008  | 0.788    | -0.049 | 0.143     | -0.047 | 8.00E-13   |
| 12                 | 49277680  | 12q13.12 | yes             | ADCY6        | rs77105837   | A  | 0.94 | 0.048     | 0.001873  | 0.089  | 3.30E-08 | 42              | 0.0002   | 0.002  | 0.923    | -0.042 | 0.026     | -0.011 | 0.003      |
| 12                 | 49385679  | 12q13.12 | yes             | WNT1         | rs10875906   | T  | 0.27 | 0.046     | 3.23E-08  | 0.069  | 4.29E-15 | 42              | 0.0008   | 0.021  | 0.016    | 0.046  | 1.10E-05  | 0.027  | 3.80E-40   |
| 12                 | 90412755  | 12q21.33 | no              | GALNT4       | rs4842705    | A  | 0.58 | -0.048    | 1.79E-11  | -0.049 | 8.98E-12 | 43              | 0.0011   | -0.024 | 0.002    | -0.025 | 0.006     | -0.048 | 4.50E-156  |
| 12                 | 93982332  | 12q22    | no              | SOC2         | rs7977788**  | A  | 0.24 | 0.045     | 4.78E-08  | 0.046  | 2.46E-08 | 44              | 0.0007   | 0.004  | 0.682    | 0.002  | 0.829     | 0.011  | 1.70E-07   |
| 12                 | 107373522 | 12q23.3  | no              | MTERFD3      | rs7302653    | C  | 0.51 | 0.048     | 1.91E-11  | 0.048  | 1.71E-11 | 45              | 0.0011   | 0.026  | 0.001    | 0.027  | 0.002     | -0.012 | 1.50E-10   |
| 13                 | 37473386  | 13q13.3  | no              | SMAD9        | rs493248     | T  | 0.23 | 0.050     | 1.27E-09  | 0.050  | 9.65E-10 | 46              | 0.0009   | 0.011  | 0.222    | 0.022  | 0.038     | 0.017  | 1.00E-15   |
| 13                 | 43148546  | 13q14.11 | no              | TNFSF11      | rs138818878  | C  | 0.96 | -0.121    | 1.87E-08  | -0.122 | 1.33E-08 | 47              | 0.0011   | -0.085 | 1.85E-04 | -0.145 | 3.17E-08  | -0.058 | 1.60E-25   |
| 16                 | 392318    | 16p13.3  | yes             | AXIN1        | rs8047501    | A  | 0.49 | 0.060     | 2.71E-16  | 0.060  | 3.04E-16 | 48              | 0.0018   | 0.051  | 1.11E-10 | 0.050  | 5.24E-08  | 0.023  | 2.00E-37   |
| 16                 | 87182052  | 16q24.2  | no              | C16orf95     | rs1984529    | A  | 0.44 | -0.044    | 1.13E-09  | -0.044 | 1.31E-09 | 49              | 0.0010   | -0.003 | 0.650    | -0.010 | 0.284     | -0.006 | 1.10E-04   |
| 17                 | 837381    | 17p13.3  | no              | NXN          | rs11650468** | T  | 0.59 | -0.048    | 2.25E-09  | -0.048 | 1.99E-09 | 50              | 0.0011   | -0.001 | 0.878    | 0.009  | 0.347     | -0.003 | 0.130      |
| 17                 | 2068932   | 17p11.2  | no              | SMG6         | rs4790881    | A  | 0.70 | 0.043     | 2.45E-08  | 0.043  | 2.02E-08 | 51              | 0.0008   | 0.050  | 2.92E-09 | 0.035  | 3.41E-04  | 0.052  | 2.40E-153  |
| 17                 | 41862277  | 17q21.31 | no              | C17orf105    | rs34814687   | A  | 0.08 | 0.100     | 5.66E-13  | 0.100  | 6.15E-13 | 52              | 0.0014   | 0.085  | 1.75E-08 | 0.092  | 1.55E-07  | 0.071  | 5.20E-97   |
| 17                 | 63305939  | 17q24.1  | no              | RGS9         | rs12941447   | A  | 0.12 | -0.066    | 5.94E-09  | -0.068 | 2.57E-09 | 53              | 0.0009   | -0.027 | 0.028    | -0.019 | 0.180     | -0.026 | 3.70E-19   |
| 17                 | 63820304  | 17q24.1  | no              | CEP112       | rs12601958   | A  | 0.69 | -0.060    | 2.06E-15  | -0.059 | 9.52E-15 | 53              | 0.0015   | -0.008 | 0.357    | -0.022 | 0.022     | -0.010 | 1.80E-06   |
| 17                 | 66453305  | 17q24.2  | no              | PRKAR1A      | rs71378928*  | C  | 0.23 | -0.050    | 2.67E-09  | -0.051 | 1.71E-09 | 54              | 0.0009   | 0.007  | 0.434    | -0.022 | 0.040     | 0.003  | 0.240      |
| 17                 | 67672730  | 17q24.3  | no              | MAP2K6       | rs2214207**  | T  | 0.60 | 0.038     | 1.97E-07  | 0.041  | 1.70E-08 | 55              | 0.0007   | -0.015 | 0.055    | 0.000  | 0.978     | 0.005  | 0.043      |
| 17                 | 68060451  | 17q24.3  | no              | KCNJ16       | rs72856781** | A  | 0.66 | -0.049    | 4.74E-11  | -0.049 | 3.80E-11 | 56              | 0.0011   | 0.008  | 0.303    | 0.008  | 0.392     | 0.008  | 1.80E-04   |
| 17                 | 68217231  | 17q24.3  | no              | KCNJ2        | rs236529**   | A  | 0.41 | 0.049     | 3.79E-12  | 0.049  | 7.69E-12 | 56              | 0.0012   | -0.005 | 0.559    | 0.012  | 0.203     | -0.002 | 0.210      |
| 18                 | 60059716  | 18q21.33 | no              | TNFRSF11A    | rs6567278    | T  | 0.56 | 0.048     | 1.30E-11  | 0.048  | 1.55E-11 | 56              | 0.0011   | 0.016  | 0.036    | 0.041  | 7.31E-06  | 0.018  | 4.00E-23   |
| 20                 | 10640306  | 20p12.2  | yes             | JAG1         | rs6040061    | A  | 0.49 | -0.044    | 2.17E-10  | -0.044 | 2.52E-10 | 57              | 0.0010   | -0.030 | 9.52E-05 | -0.052 | 5.94E-09  | -0.031 | 5.00E-69   |
| 20                 | 39088536  | 20q12    | no              | MAFB         | rs6029124### | T  | 0.28 | 0.047     | 1.60E-08  | 0.047  | 1.34E-08 | 58              | 0.0009   | 0.006  | 0.518    | 0.029  | 0.003     | 0.007  | 9.60E-05   |
| 21                 | 36970350  | 21q22.12 | no              | RUNX1        | rs9976876    | T  | 0.46 | -0.042    | 7.21E-09  | -0.042 | 8.32E-09 | 59              | 0.0009   | -0.016 | 0.041    | -0.019 | 0.031     | -0.019 | 6.50E-26   |

\* Reported for the first time in relation to a bone phenotype

\*\*Reported for the first time in a DXA-Derived site-specific BMD phenotype

# Values for e-BMD are reported for rs61861957 (r2=0.914)

## Values for e-BMD are reported for rs6029123 (r2=0.971)

**Supplementary Table 2. Genome-wide significant SNPs with functional deleterious annotation.** Genomic coordinates are on build 37 of the human genome. Beta coefficients and allele frequencies (EAF) are reported for the A1 allele. Annotation and CADD scores are extracted from FUMA results. In bold, SNPs with CADD score over 20.

| CHR       | BP               | SNP               | A1       | A2       | EAF         | beta          | P               | Gene          | Annotation               | CADD scores |
|-----------|------------------|-------------------|----------|----------|-------------|---------------|-----------------|---------------|--------------------------|-------------|
| 4         | 994414           | rs3755955         | a        | g        | 0.16        | -0.062        | 1.26E-10        | IDUA          | nonsynonymous SNV        | 0.09        |
| 4         | 995868           | rs114806891       | t        | c        | 0.07        | 0.091         | 1.57E-09        | IDUA          | stopgain                 | 16.19       |
| 4         | 995919           | rs6830825         | c        | g        | 0.16        | -0.057        | 2.93E-09        | IDUA          | nonsynonymous SNV        | 1.504       |
| 4         | 995997           | rs6811373         | a        | g        | 0.84        | 0.058         | 2.70E-09        | IDUA          | nonsynonymous SNV        | 4.145       |
| 4         | 996012           | rs6831021         | c        | g        | 0.16        | -0.058        | 2.69E-09        | IDUA          | nonsynonymous SNV        | 0.324       |
| 4         | 996165           | rs6831280         | a        | g        | 0.16        | -0.060        | 8.81E-10        | IDUA          | nonsynonymous SNV        | 0.05        |
| 4         | 996690           | rs73066479        | a        | g        | 0.16        | -0.056        | 1.63E-08        | IDUA          | nonsynonymous SNV        | 2.646       |
| 4         | 1019011          | rs4647932         | t        | c        | 0.06        | 0.085         | 1.05E-08        | FGFRL1        | nonsynonymous SNV        | 10.84       |
| 7         | 120776097        | rs41281692        | c        | g        | 0.55        | -0.058        | 1.60E-15        | CPED1         | nonsynonymous SNV        | 1.623       |
| <b>7</b>  | <b>120876835</b> | <b>rs35793694</b> | <b>a</b> | <b>g</b> | <b>0.92</b> | <b>-0.124</b> | <b>7.34E-20</b> | <b>CPED1</b>  | <b>nonsynonymous SNV</b> | <b>22.9</b> |
| <b>7</b>  | <b>120969769</b> | <b>rs2908004</b>  | <b>a</b> | <b>g</b> | <b>0.44</b> | <b>0.115</b>  | <b>3.07E-57</b> | <b>WNT16</b>  | <b>nonsynonymous SNV</b> | <b>20.8</b> |
| 7         | 120979089        | rs2707466         | t        | c        | 0.44        | 0.114         | 9.24E-57        | WNT16         | nonsynonymous SNV        | 16.85       |
| 8         | 119964052        | rs2073618         | c        | g        | 0.46        | -0.064        | 4.20E-19        | TNFRSF11B     | nonsynonymous SNV        | 15.99       |
| <b>11</b> | <b>27390144</b>  | <b>rs34717439</b> | <b>a</b> | <b>g</b> | <b>0.03</b> | <b>-0.133</b> | <b>5.22E-11</b> | <b>LGR4</b>   | <b>nonsynonymous SNV</b> | <b>23.4</b> |
| <b>11</b> | <b>27679916</b>  | <b>rs6265</b>     | <b>t</b> | <b>c</b> | <b>0.19</b> | <b>0.052</b>  | <b>7.16E-09</b> | <b>BDNF</b>   | <b>nonsynonymous SNV</b> | <b>24.1</b> |
| 11        | 46387868         | rs1317826         | a        | g        | 0.70        | -0.047        | 3.54E-09        | DGKZ          | nonsynonymous SNV        | 1.042       |
| <b>11</b> | <b>46893108</b>  | <b>rs2306029</b>  | <b>t</b> | <b>c</b> | <b>0.46</b> | <b>0.055</b>  | <b>2.36E-14</b> | <b>LRP4</b>   | <b>nonsynonymous SNV</b> | <b>21.7</b> |
| 11        | 46898771         | rs6485702         | t        | c        | 0.35        | 0.055         | 2.47E-13        | LRP4          | nonsynonymous SNV        | 7.073       |
| <b>11</b> | <b>68174189</b>  | <b>rs4988321</b>  | <b>a</b> | <b>g</b> | <b>0.04</b> | <b>-0.168</b> | <b>6.84E-17</b> | <b>LRP5</b>   | <b>nonsynonymous SNV</b> | <b>23.2</b> |
| <b>11</b> | <b>68201295</b>  | <b>rs3736228</b>  | <b>t</b> | <b>c</b> | <b>0.15</b> | <b>-0.118</b> | <b>6.62E-30</b> | <b>LRP5</b>   | <b>nonsynonymous SNV</b> | <b>20.9</b> |
| 12        | 28605426         | rs10771427        | a        | g        | 0.77        | 0.060         | 1.30E-12        | CCDC91        | nonsynonymous SNV        | 9.094       |
| <b>12</b> | <b>49168798</b>  | <b>rs3730071</b>  | <b>a</b> | <b>c</b> | <b>0.03</b> | <b>-0.155</b> | <b>8.42E-15</b> | <b>ADCY6</b>  | <b>nonsynonymous SNV</b> | <b>23.2</b> |
| 12        | 49224108         | rs11551274        | c        | g        | 0.03        | -0.173        | 4.41E-17        | DDX23         | nonsynonymous SNV        | 0.768       |
| <b>12</b> | <b>49399132</b>  | <b>rs1126930</b>  | <b>c</b> | <b>g</b> | <b>0.03</b> | <b>0.139</b>  | <b>1.68E-10</b> | <b>PRKAG1</b> | <b>nonsynonymous SNV</b> | <b>22.7</b> |
| 13        | 43148546         | rs138818878       | c        | g        | 0.96        | -0.121        | 1.87E-08        | TNFSF11       | nonsynonymous SNV        | 17.61       |
| 17        | 66449122         | rs883541          | a        | g        | 0.77        | 0.049         | 4.70E-09        | WIPI1         | nonsynonymous SNV        | 15.93       |

**Supplementary Table 3. SK-BMD Genome-wide significant SNPs conditionally independent from variants previously reported as associated with bone traits.** Beta coefficients and allele frequency (EAF) are reported for the A1 allele and gene referring to the closest gene to the particular variant. Highlighted in green background the four novel loci.

| Chr | SNP            | bp        | EA | EAF    | b       | se     | p        | n       | bC      | bC_se  | pC       | Gene  | Loci    |
|-----|----------------|-----------|----|--------|---------|--------|----------|---------|---------|--------|----------|-------|---------|
| 1   | 1:68634642     | 68634642  | A  | 0.1377 | -0.0588 | 0.0101 | 5.50E-09 | 47950.7 | -0.0775 | 0.0092 | 2.66E-17 | WLS   | 1p31.3  |
| 3   | 3:147103892    | 147103892 | A  | 0.063  | -0.0805 | 0.0144 | 2.46E-08 | 47451.1 | -0.0794 | 0.0144 | 3.42E-08 | ZIC4  | 3q24    |
| 3   | 3:147107186    | 147107186 | T  | 0.9369 | 0.0805  | 0.0144 | 2.29E-08 | 47380.9 | 0.0793  | 0.0144 | 3.53E-08 | ZIC4  | 3q24    |
| 3   | 3:147115775    | 147115775 | T  | 0.9364 | 0.0801  | 0.0144 | 2.38E-08 | 47033.6 | 0.0791  | 0.0144 | 3.91E-08 | ZIC4  | 3q24    |
| 3   | 3:147119629    | 147119629 | T  | 0.0631 | -0.0811 | 0.0144 | 1.82E-08 | 47380.4 | -0.0801 | 0.0144 | 2.63E-08 | ZIC4  | 3q24    |
| 3   | 3:147119740    | 147119740 | T  | 0.0632 | -0.0811 | 0.0144 | 1.83E-08 | 47310.4 | -0.0801 | 0.0144 | 2.63E-08 | ZIC1  | 3q24    |
| 3   | 3:147121650    | 147121650 | T  | 0.0632 | -0.0814 | 0.0144 | 1.64E-08 | 47310.2 | -0.0804 | 0.0144 | 2.33E-08 | ZIC1  | 3q24    |
| 3   | 3:147124889    | 147124889 | A  | 0.0632 | -0.0813 | 0.0144 | 1.69E-08 | 47310.3 | -0.0803 | 0.0144 | 2.37E-08 | ZIC1  | 3q24    |
| 3   | 3:147129882    | 147129882 | A  | 0.0632 | -0.0816 | 0.0144 | 1.48E-08 | 47310.1 | -0.0806 | 0.0144 | 2.10E-08 | ZIC1  | 3q24    |
| 3   | 3:147134598    | 147134598 | T  | 0.9372 | 0.0816  | 0.0144 | 1.54E-08 | 47591.3 | 0.0805  | 0.0144 | 2.23E-08 | ZIC1  | 3q24    |
| 3   | 3:147136172    | 147136172 | A  | 0.0628 | -0.0817 | 0.0144 | 1.48E-08 | 47591.2 | -0.0805 | 0.0144 | 2.22E-08 | ZIC1  | 3q24    |
| 3   | 3:147136624    | 147136624 | T  | 0.0624 | -0.0833 | 0.0145 | 9.79E-09 | 47216.7 | -0.0820 | 0.0145 | 1.50E-08 | ZIC1  | 3q24    |
| 3   | 3:147137705:ID | 147137705 | D  | 0.0624 | -0.1069 | 0.0177 | 1.54E-09 | 31673.3 | -0.1057 | 0.0177 | 2.35E-09 | ZIC1  | 3q24    |
| 3   | 3:147139626    | 147139626 | T  | 0.9372 | 0.0819  | 0.0144 | 1.40E-08 | 47591   | 0.0807  | 0.0144 | 2.01E-08 | ZIC1  | 3q24    |
| 3   | 3:147139741    | 147139741 | T  | 0.0628 | -0.0817 | 0.0144 | 1.51E-08 | 47591.2 | -0.0805 | 0.0144 | 2.18E-08 | ZIC1  | 3q24    |
| 3   | 3:147145745    | 147145745 | T  | 0.9373 | 0.0816  | 0.0145 | 1.71E-08 | 47007   | 0.0804  | 0.0145 | 2.89E-08 | ZIC1  | 3q24    |
| 3   | 3:147151946    | 147151946 | A  | 0.0595 | -0.0836 | 0.0149 | 1.96E-08 | 46751.6 | -0.0822 | 0.0149 | 3.35E-08 | ZIC1  | 3q24    |
| 3   | 3:147152103    | 147152103 | A  | 0.06   | -0.0833 | 0.0148 | 1.98E-08 | 47015.6 | -0.0819 | 0.0148 | 3.04E-08 | ZIC1  | 3q24    |
| 3   | 3:147153885    | 147153885 | T  | 0.7046 | 0.0483  | 0.0076 | 2.38E-10 | 48305.2 | 0.0483  | 0.0076 | 2.15E-10 | ZIC1  | 3q24    |
| 3   | 3:147157704    | 147157704 | A  | 0.9399 | 0.0837  | 0.0149 | 1.79E-08 | 46314.1 | 0.0823  | 0.0149 | 3.29E-08 | ZIC1  | 3q24    |
| 3   | 3:147159244    | 147159244 | A  | 0.9374 | 0.0818  | 0.0145 | 1.77E-08 | 47076.9 | 0.0805  | 0.0145 | 2.77E-08 | ZIC1  | 3q24    |
| 3   | 3:147163128    | 147163128 | T  | 0.2893 | -0.0492 | 0.0078 | 2.40E-10 | 46423.9 | -0.0488 | 0.0078 | 4.11E-10 | ZIC1  | 3q24    |
| 3   | 3:147163978    | 147163978 | A  | 0.297  | -0.0489 | 0.0076 | 1.37E-10 | 48153.2 | -0.0489 | 0.0076 | 1.30E-10 | ZIC1  | 3q24    |
| 3   | 3:147167274    | 147167274 | A  | 0.0595 | -0.0844 | 0.0149 | 1.62E-08 | 46751   | -0.0830 | 0.0149 | 2.46E-08 | ZIC1  | 3q24    |
| 3   | 3:147168680:ID | 147168680 | D  | 0.0616 | -0.1111 | 0.0182 | 1.12E-09 | 30317.8 | -0.1098 | 0.0182 | 1.59E-09 | ZIC1  | 3q24    |
| 3   | 3:147169704    | 147169704 | C  | 0.9405 | 0.0847  | 0.015  | 1.46E-08 | 46129.5 | 0.0833  | 0.0150 | 2.71E-08 | ZIC1  | 3q24    |
| 3   | 3:147173184    | 147173184 | A  | 0.9373 | 0.0828  | 0.0146 | 1.34E-08 | 46364.4 | 0.0815  | 0.0146 | 2.31E-08 | ZIC1  | 3q24    |
| 3   | 3:147175718    | 147175718 | T  | 0.9399 | 0.0849  | 0.0149 | 1.27E-08 | 46313.1 | 0.0836  | 0.0149 | 2.01E-08 | ZIC1  | 3q24    |
| 3   | 3:147187915    | 147187915 | A  | 0.9392 | 0.0858  | 0.0149 | 8.03E-09 | 45813   | 0.0846  | 0.0149 | 1.32E-08 | ZIC1  | 3q24    |
| 3   | 3:147193692    | 147193692 | A  | 0.937  | 0.083   | 0.0146 | 1.24E-08 | 46158   | 0.0818  | 0.0146 | 2.06E-08 | ZIC1  | 3q24    |
| 3   | 3:147198407    | 147198407 | T  | 0.0602 | -0.0842 | 0.015  | 1.78E-08 | 45627.1 | -0.0831 | 0.0150 | 3.01E-08 | ZIC1  | 3q24    |
| 3   | 3:147203215    | 147203215 | T  | 0.9373 | 0.0824  | 0.0146 | 1.79E-08 | 46364.7 | 0.0812  | 0.0146 | 2.58E-08 | ZIC1  | 3q24    |
| 3   | 3:147203820    | 147203820 | A  | 0.6344 | 0.0416  | 0.0073 | 1.10E-08 | 46991.8 | 0.0419  | 0.0073 | 9.25E-09 | ZIC1  | 3q24    |
| 3   | 3:147204553    | 147204553 | A  | 0.0629 | -0.0824 | 0.0146 | 1.85E-08 | 46227   | -0.0812 | 0.0146 | 2.57E-08 | ZIC1  | 3q24    |
| 3   | 3:147207242    | 147207242 | T  | 0.9373 | 0.0817  | 0.0147 | 2.42E-08 | 45736.5 | 0.0805  | 0.0147 | 4.21E-08 | ZIC1  | 3q24    |
| 3   | 3:147207565    | 147207565 | T  | 0.3663 | -0.0413 | 0.0073 | 1.32E-08 | 46954.2 | -0.0416 | 0.0073 | 1.23E-08 | ZIC1  | 3q24    |
| 3   | 3:147207613    | 147207613 | T  | 0.3662 | -0.0415 | 0.0073 | 1.18E-08 | 46959.3 | -0.0418 | 0.0073 | 1.04E-08 | ZIC1  | 3q24    |
| 3   | 3:147207883    | 147207883 | T  | 0.9373 | 0.0817  | 0.0147 | 2.44E-08 | 45736.5 | 0.0805  | 0.0147 | 4.21E-08 | ZIC1  | 3q24    |
| 3   | 3:147208921    | 147208921 | T  | 0.9393 | 0.0842  | 0.0151 | 2.35E-08 | 44677.5 | 0.0829  | 0.0151 | 3.89E-08 | ZIC1  | 3q24    |
| 3   | 3:147209179    | 147209179 | T  | 0.7029 | 0.0475  | 0.0077 | 6.36E-10 | 46903.7 | 0.0476  | 0.0077 | 6.41E-10 | ZIC1  | 3q24    |
| 3   | 3:147209795:ID | 147209795 | D  | 0.0624 | -0.1045 | 0.018  | 6.29E-09 | 30627.9 | -0.1033 | 0.0180 | 9.39E-09 | ZIC1  | 3q24    |
| 3   | 3:147212674    | 147212674 | C  | 0.0631 | -0.0819 | 0.0146 | 2.03E-08 | 46090.6 | -0.0808 | 0.0146 | 3.09E-08 | ZIC1  | 3q24    |
| 3   | 3:147213259    | 147213259 | A  | 0.9369 | 0.0819  | 0.0146 | 2.05E-08 | 46090.6 | 0.0808  | 0.0146 | 3.09E-08 | ZIC1  | 3q24    |
| 3   | 3:147213365    | 147213365 | T  | 0.9369 | 0.0819  | 0.0146 | 2.05E-08 | 46090.6 | 0.0808  | 0.0146 | 3.09E-08 | ZIC1  | 3q24    |
| 3   | 3:147215263    | 147215263 | A  | 0.9369 | 0.0821  | 0.0146 | 2.11E-08 | 46090.5 | 0.0807  | 0.0146 | 3.20E-08 | ZIC1  | 3q24    |
| 3   | 3:147215392    | 147215392 | A  | 0.9285 | 0.0796  | 0.0142 | 2.18E-08 | 43386.9 | 0.0780  | 0.0142 | 3.88E-08 | ZIC1  | 3q24    |
| 3   | 3:147215426    | 147215426 | A  | 0.0633 | -0.0836 | 0.0146 | 1.13E-08 | 45953.4 | -0.0822 | 0.0146 | 1.77E-08 | ZIC1  | 3q24    |
| 3   | 3:147216849    | 147216849 | A  | 0.9369 | 0.0822  | 0.0147 | 2.08E-08 | 45465.5 | 0.0808  | 0.0147 | 3.81E-08 | ZIC1  | 3q24    |
| 3   | 3:147217113    | 147217113 | T  | 0.9363 | 0.0816  | 0.0146 | 2.40E-08 | 45685.7 | 0.0802  | 0.0146 | 3.88E-08 | ZIC1  | 3q24    |
| 3   | 3:147217814    | 147217814 | T  | 0.0631 | -0.0823 | 0.0147 | 2.00E-08 | 45465.4 | -0.0809 | 0.0147 | 3.67E-08 | ZIC1  | 3q24    |
| 3   | 3:147221641    | 147221641 | A  | 0.9371 | 0.0818  | 0.0147 | 2.76E-08 | 45600.7 | 0.0806  | 0.0147 | 4.09E-08 | ZIC1  | 3q24    |
| 3   | 3:147222983    | 147222983 | C  | 0.937  | 0.0825  | 0.0147 | 2.09E-08 | 45532.6 | 0.0813  | 0.0147 | 3.12E-08 | ZIC1  | 3q24    |
| 6   | 6:126678268    | 126678268 | T  | 0.4721 | -0.0509 | 0.0077 | 3.41E-11 | 39290.6 | -0.0322 | 0.0053 | 1.43E-09 | CENPW | 6q22.33 |
| 6   | 6:126815604    | 126815604 | A  | 0.4589 | -0.0435 | 0.0076 | 1.04E-08 | 40491.6 | -0.0285 | 0.0050 | 9.62E-09 | CENPW | 6q22.33 |



| Chr | SNP            | bp        | EA | EAf    | b       | se     | p        | n       | bC      | bC_se  | pC       | Gene  | Loci    |
|-----|----------------|-----------|----|--------|---------|--------|----------|---------|---------|--------|----------|-------|---------|
| 8   | 8:103876183    | 103876183 | A  | 0.1831 | -0.0564 | 0.0092 | 7.80E-10 | 45872.1 | -0.0560 | 0.0092 | 1.18E-09 | AZIN1 | 8q22.3  |
| 8   | 8:103876325    | 103876325 | A  | 0.183  | -0.0567 | 0.0092 | 6.48E-10 | 45891.2 | -0.0563 | 0.0092 | 9.67E-10 | AZIN1 | 8q22.3  |
| 8   | 8:103876780    | 103876780 | T  | 0.1826 | -0.0573 | 0.0092 | 4.44E-10 | 45968.5 | -0.0569 | 0.0092 | 6.47E-10 | AZIN1 | 8q22.3  |
| 8   | 8:103877434    | 103877434 | A  | 0.3653 | -0.0432 | 0.0074 | 4.79E-09 | 45743.8 | -0.0428 | 0.0074 | 7.39E-09 | AZIN1 | 8q22.3  |
| 8   | 8:103878469    | 103878469 | A  | 0.7746 | 0.0566  | 0.0085 | 2.46E-11 | 46030.9 | 0.0563  | 0.0085 | 3.68E-11 | AZIN1 | 8q22.3  |
| 8   | 8:103879532    | 103879532 | A  | 0.1827 | -0.0578 | 0.0092 | 3.12E-10 | 45948.2 | -0.0573 | 0.0092 | 4.80E-10 | AZIN1 | 8q22.3  |
| 8   | 8:103879686    | 103879686 | C  | 0.8159 | 0.0567  | 0.0091 | 5.33E-10 | 46687.7 | 0.0561  | 0.0091 | 6.89E-10 | AZIN1 | 8q22.3  |
| 8   | 8:103879797    | 103879797 | C  | 0.3678 | -0.0427 | 0.0073 | 6.29E-09 | 46871.4 | -0.0423 | 0.0073 | 7.09E-09 | AZIN1 | 8q22.3  |
| 8   | 8:103880307    | 103880307 | A  | 0.8169 | 0.0569  | 0.0091 | 4.69E-10 | 46885.1 | 0.0564  | 0.0091 | 5.68E-10 | AZIN1 | 8q22.3  |
| 8   | 8:103881011    | 103881011 | C  | 0.6263 | 0.043   | 0.0073 | 4.56E-09 | 46565.3 | 0.0426  | 0.0073 | 5.36E-09 | AZIN1 | 8q22.3  |
| 8   | 8:103881433    | 103881433 | T  | 0.1828 | -0.0575 | 0.0092 | 3.87E-10 | 45929.1 | -0.0570 | 0.0092 | 5.89E-10 | AZIN1 | 8q22.3  |
| 8   | 8:103881570    | 103881570 | A  | 0.6264 | 0.0428  | 0.0073 | 5.46E-09 | 46570.7 | 0.0424  | 0.0073 | 6.31E-09 | AZIN1 | 8q22.3  |
| 8   | 8:103882228    | 103882228 | C  | 0.3574 | -0.0432 | 0.0074 | 5.26E-09 | 46180.5 | -0.0428 | 0.0074 | 7.37E-09 | AZIN1 | 8q22.3  |
| 8   | 8:103882658    | 103882658 | T  | 0.3738 | -0.043  | 0.0073 | 4.78E-09 | 46560.3 | -0.0426 | 0.0073 | 5.20E-09 | AZIN1 | 8q22.3  |
| 8   | 8:103883316    | 103883316 | A  | 0.357  | -0.0441 | 0.0074 | 2.54E-09 | 46202   | -0.0437 | 0.0074 | 3.62E-09 | AZIN1 | 8q22.3  |
| 8   | 8:103883630    | 103883630 | A  | 0.1972 | -0.0562 | 0.009  | 3.33E-10 | 45286   | -0.0558 | 0.0090 | 5.57E-10 | AZIN1 | 8q22.3  |
| 8   | 8:103883865    | 103883865 | A  | 0.6423 | 0.0436  | 0.0074 | 3.61E-09 | 46162.6 | 0.0432  | 0.0074 | 5.34E-09 | AZIN1 | 8q22.3  |
| 8   | 8:103885884    | 103885884 | A  | 0.1875 | -0.0589 | 0.0091 | 9.45E-11 | 46029.3 | -0.0584 | 0.0091 | 1.41E-10 | AZIN1 | 8q22.3  |
| 8   | 8:103886116    | 103886116 | T  | 0.1891 | -0.0575 | 0.009  | 1.75E-10 | 46753.5 | -0.0570 | 0.0090 | 2.42E-10 | AZIN1 | 8q22.3  |
| 8   | 8:103886397    | 103886397 | A  | 0.8109 | 0.0575  | 0.009  | 1.74E-10 | 46753.5 | 0.0570  | 0.0090 | 2.42E-10 | AZIN1 | 8q22.3  |
| 8   | 8:103887097    | 103887097 | T  | 0.189  | -0.0575 | 0.009  | 1.72E-10 | 46772.5 | -0.0570 | 0.0090 | 2.42E-10 | AZIN1 | 8q22.3  |
| 8   | 8:103888931    | 103888931 | C  | 0.1891 | -0.0575 | 0.009  | 1.71E-10 | 46753.5 | -0.0570 | 0.0090 | 2.42E-10 | AZIN1 | 8q22.3  |
| 8   | 8:103889048    | 103889048 | A  | 0.7531 | 0.0557  | 0.0082 | 1.17E-11 | 46441.3 | 0.0554  | 0.0082 | 1.48E-11 | AZIN1 | 8q22.3  |
| 8   | 8:103889803    | 103889803 | T  | 0.6259 | 0.0431  | 0.0073 | 4.19E-09 | 46545.1 | 0.0427  | 0.0073 | 4.90E-09 | AZIN1 | 8q22.3  |
| 8   | 8:103890807    | 103890807 | T  | 0.8165 | 0.0577  | 0.0091 | 2.59E-10 | 46804.7 | 0.0573  | 0.0091 | 3.17E-10 | AZIN1 | 8q22.3  |
| 8   | 8:103891944    | 103891944 | A  | 0.8161 | 0.0582  | 0.0091 | 1.83E-10 | 46725   | 0.0578  | 0.0091 | 2.22E-10 | AZIN1 | 8q22.3  |
| 8   | 8:103892644    | 103892644 | T  | 0.1837 | -0.0574 | 0.0091 | 3.15E-10 | 46765.6 | -0.0570 | 0.0091 | 3.92E-10 | AZIN1 | 8q22.3  |
| 8   | 8:103892855    | 103892855 | C  | 0.7725 | 0.0568  | 0.0084 | 1.59E-11 | 46824.7 | 0.0564  | 0.0084 | 1.85E-11 | AZIN1 | 8q22.3  |
| 8   | 8:103896967    | 103896967 | C  | 0.1859 | -0.0592 | 0.0091 | 7.66E-11 | 46334.1 | -0.0587 | 0.0091 | 1.12E-10 | AZIN1 | 8q22.3  |
| 8   | 8:103898531    | 103898531 | A  | 0.627  | 0.0429  | 0.0073 | 5.32E-09 | 46600.8 | 0.0425  | 0.0073 | 5.77E-09 | AZIN1 | 8q22.3  |
| 8   | 8:103898631    | 103898631 | T  | 0.8142 | 0.0589  | 0.0091 | 9.94E-11 | 46353.8 | 0.0584  | 0.0091 | 1.39E-10 | AZIN1 | 8q22.3  |
| 8   | 8:103899282    | 103899282 | A  | 0.7703 | 0.0579  | 0.0084 | 4.56E-12 | 46506.6 | 0.0575  | 0.0084 | 7.73E-12 | AZIN1 | 8q22.3  |
| 8   | 8:103900885    | 103900885 | A  | 0.3727 | -0.0428 | 0.0073 | 5.85E-09 | 46616.2 | -0.0424 | 0.0073 | 6.22E-09 | AZIN1 | 8q22.3  |
| 8   | 8:103901234    | 103901234 | T  | 0.2291 | -0.0581 | 0.0088 | 4.49E-11 | 42452.6 | -0.0577 | 0.0088 | 5.52E-11 | AZIN1 | 8q22.3  |
| 8   | 8:103901908    | 103901908 | A  | 0.7202 | 0.0491  | 0.0079 | 4.99E-10 | 46176.3 | 0.0486  | 0.0079 | 7.47E-10 | AZIN1 | 8q22.3  |
| 8   | 8:103904753    | 103904753 | T  | 0.6263 | 0.0429  | 0.0073 | 5.32E-09 | 46565.5 | 0.0425  | 0.0073 | 5.61E-09 | AZIN1 | 8q22.3  |
| 8   | 8:103908028    | 103908028 | T  | 0.6271 | 0.0429  | 0.0073 | 5.10E-09 | 46605.9 | 0.0425  | 0.0073 | 5.69E-09 | AZIN1 | 8q22.3  |
| 8   | 8:103908161    | 103908161 | T  | 0.6271 | 0.0427  | 0.0073 | 6.03E-09 | 46606.2 | 0.0423  | 0.0073 | 6.70E-09 | AZIN1 | 8q22.3  |
| 8   | 8:103909436:ID | 103909436 | D  | 0.184  | -0.063  | 0.0111 | 1.52E-08 | 31386.5 | -0.0625 | 0.0111 | 1.80E-08 | AZIN1 | 8q22.3  |
| 8   | 8:103909612    | 103909612 | A  | 0.7233 | 0.0501  | 0.0079 | 2.25E-10 | 46492.2 | 0.0497  | 0.0079 | 3.27E-10 | AZIN1 | 8q22.3  |
| 8   | 8:103909907    | 103909907 | T  | 0.6279 | 0.0429  | 0.0074 | 5.16E-09 | 45394.4 | 0.0425  | 0.0074 | 9.19E-09 | AZIN1 | 8q22.3  |
| 8   | 8:103911835    | 103911835 | A  | 0.2767 | -0.0497 | 0.0079 | 3.03E-10 | 46492.8 | -0.0493 | 0.0079 | 4.53E-10 | AZIN1 | 8q22.3  |
| 8   | 8:103912414    | 103912414 | A  | 0.6271 | 0.0428  | 0.0073 | 5.78E-09 | 46606   | 0.0424  | 0.0073 | 6.19E-09 | AZIN1 | 8q22.3  |
| 8   | 8:103912514    | 103912514 | T  | 0.2755 | -0.0506 | 0.0079 | 1.81E-10 | 46616.6 | -0.0502 | 0.0079 | 2.17E-10 | AZIN1 | 8q22.3  |
| 8   | 8:103914366    | 103914366 | A  | 0.7668 | 0.0487  | 0.0084 | 6.00E-09 | 46031.1 | 0.0482  | 0.0084 | 9.70E-09 | AZIN1 | 8q22.3  |
| 8   | 8:103914490    | 103914490 | A  | 0.6357 | 0.0432  | 0.0074 | 4.58E-09 | 45797.3 | 0.0428  | 0.0074 | 7.38E-09 | AZIN1 | 8q22.3  |
| 8   | 8:103914604    | 103914604 | A  | 0.8142 | 0.0586  | 0.0091 | 1.22E-10 | 46354.2 | 0.0582  | 0.0091 | 1.67E-10 | AZIN1 | 8q22.3  |
| 8   | 8:103914746    | 103914746 | A  | 0.3742 | -0.0432 | 0.0073 | 3.94E-09 | 46539.9 | -0.0428 | 0.0073 | 4.41E-09 | AZIN1 | 8q22.3  |
| 8   | 8:103916392    | 103916392 | T  | 0.8831 | 0.0673  | 0.0111 | 1.48E-09 | 45658.1 | 0.0674  | 0.0111 | 1.28E-09 | AZIN1 | 8q22.3  |
| 8   | 8:103916654    | 103916654 | A  | 0.627  | 0.0432  | 0.0073 | 4.24E-09 | 46600.3 | 0.0428  | 0.0073 | 4.46E-09 | AZIN1 | 8q22.3  |
| 8   | 8:103919090    | 103919090 | T  | 0.7716 | 0.0588  | 0.0084 | 2.67E-12 | 46691.2 | 0.0584  | 0.0084 | 3.55E-12 | AZIN1 | 8q22.3  |
| 8   | 8:103926036    | 103926036 | A  | 0.1858 | -0.0583 | 0.0091 | 1.46E-10 | 46354.6 | -0.0579 | 0.0091 | 2.05E-10 | AZIN1 | 8q22.3  |
| 8   | 8:103926197    | 103926197 | T  | 0.1862 | -0.0586 | 0.0091 | 1.20E-10 | 46277.3 | -0.0582 | 0.0091 | 1.65E-10 | AZIN1 | 8q22.3  |
| 8   | 8:103930583    | 103930583 | A  | 0.7638 | 0.054   | 0.0084 | 1.15E-10 | 45616.9 | 0.0538  | 0.0084 | 1.56E-10 | AZIN1 | 8q22.3  |
| 8   | 8:103930817    | 103930817 | C  | 0.7651 | 0.0545  | 0.0084 | 7.93E-11 | 45790.8 | 0.0543  | 0.0084 | 1.05E-10 | AZIN1 | 8q22.3  |
| 8   | 8:103934176    | 103934176 | T  | 0.7989 | 0.0493  | 0.0089 | 3.12E-08 | 45641.6 | 0.0494  | 0.0089 | 2.89E-08 | AZIN1 | 8q22.3  |
| 10  | 10:132252499   | 132252499 | A  | 0.3486 | -0.0459 | 0.0083 | 2.80E-08 | 37123.6 | -0.0469 | 0.0083 | 1.55E-08 | GLRX3 | 10q26.3 |

| Chr | SNP         | bp       | EA | EAF    | b       | se     | p        | n       | bC      | bC_se  | pC       | Gene    | Loci     |
|-----|-------------|----------|----|--------|---------|--------|----------|---------|---------|--------|----------|---------|----------|
| 13  | 13:51100845 | 51100845 | T  | 0.0388 | 0.0856  | 0.0182 | 2.69E-06 | 47026.7 | 0.1010  | 0.0177 | 1.13E-08 | TNFSF11 | 13q14.11 |
| 13  | 13:51163995 | 51163995 | T  | 0.0663 | 0.0682  | 0.0141 | 1.28E-06 | 47202.3 | 0.0804  | 0.0137 | 3.85E-09 | TNFSF11 | 13q14.11 |
| 17  | 17:836233   | 836233   | T  | 0.6486 | -0.0434 | 0.0079 | 4.21E-08 | 40830.5 | -0.0434 | 0.0079 | 4.01E-08 | NXN     | 17p13.3  |
| 17  | 17:837260   | 837260   | A  | 0.4129 | -0.0497 | 0.0087 | 1.05E-08 | 31644.5 | -0.0501 | 0.0087 | 8.47E-09 | NXN     | 17p13.3  |
| 17  | 17:837381   | 837381   | T  | 0.5932 | -0.0478 | 0.008  | 2.25E-09 | 37598   | -0.0479 | 0.0080 | 2.23E-09 | NXN     | 17p13.3  |
| 17  | 17:837408   | 837408   | A  | 0.3653 | 0.0464  | 0.0082 | 1.45E-08 | 37249.5 | 0.0463  | 0.0082 | 1.60E-08 | NXN     | 17p13.3  |
| 17  | 17:837617   | 837617   | T  | 0.505  | -0.048  | 0.0083 | 8.18E-09 | 33717.7 | -0.0482 | 0.0083 | 6.14E-09 | NXN     | 17p13.3  |
| 17  | 17:837680   | 837680   | T  | 0.5778 | -0.0512 | 0.0087 | 3.84E-09 | 31443.4 | -0.0513 | 0.0087 | 3.65E-09 | NXN     | 17p13.3  |
| 17  | 17:66433299 | 66433299 | A  | 0.2283 | -0.0479 | 0.0085 | 1.45E-08 | 45629.2 | -0.0463 | 0.0085 | 4.66E-08 | ARSG    | 17q24.2  |
| 17  | 17:66445469 | 66445469 | C  | 0.7693 | 0.0486  | 0.0083 | 5.51E-09 | 47503.3 | 0.0471  | 0.0083 | 1.19E-08 | ARSG    | 17q24.2  |
| 17  | 17:66446136 | 66446136 | A  | 0.769  | 0.0491  | 0.0083 | 3.43E-09 | 47459.4 | 0.0476  | 0.0083 | 8.46E-09 | ARSG    | 17q24.2  |
| 17  | 17:66447073 | 66447073 | T  | 0.2876 | -0.0441 | 0.0078 | 1.63E-08 | 46594.8 | -0.0435 | 0.0078 | 2.28E-08 | PRKAR1A | 17q24.2  |
| 17  | 17:66448490 | 66448490 | A  | 0.232  | -0.049  | 0.0083 | 3.47E-09 | 47316.4 | -0.0475 | 0.0083 | 9.11E-09 | PRKAR1A | 17q24.2  |
| 17  | 17:66449122 | 66449122 | A  | 0.7694 | 0.0488  | 0.0083 | 4.70E-09 | 47517.5 | 0.0473  | 0.0083 | 1.05E-08 | PRKAR1A | 17q24.2  |
| 17  | 17:66451708 | 66451708 | A  | 0.2306 | -0.0487 | 0.0083 | 4.68E-09 | 47517.6 | -0.0472 | 0.0083 | 1.15E-08 | PRKAR1A | 17q24.2  |
| 17  | 17:66453305 | 66453305 | C  | 0.2289 | -0.0503 | 0.0085 | 2.67E-09 | 45541.7 | -0.0485 | 0.0085 | 9.93E-09 | WIPI1   | 17q24.2  |
| 17  | 17:68060451 | 68060451 | A  | 0.6552 | -0.0489 | 0.0074 | 4.74E-11 | 46938.4 | -0.0473 | 0.0074 | 1.50E-10 | KCNJ6   | 17q24.3  |
| 17  | 17:68064408 | 68064408 | T  | 0.3457 | 0.0486  | 0.0074 | 4.42E-11 | 46881.1 | 0.0470  | 0.0074 | 1.94E-10 | KCNJ6   | 17q24.3  |
| 17  | 17:68075324 | 68075324 | T  | 0.6551 | -0.0478 | 0.0074 | 9.70E-11 | 46933.9 | -0.0463 | 0.0074 | 3.77E-10 | KCNJ6   | 17q24.3  |
| 17  | 17:68090207 | 68090207 | T  | 0.3499 | 0.0488  | 0.0074 | 4.51E-11 | 46617   | 0.0474  | 0.0074 | 1.36E-10 | KCNJ6   | 17q24.3  |
| 17  | 17:68206588 | 68206588 | T  | 0.5137 | 0.0387  | 0.007  | 3.42E-08 | 47451.2 | 0.0395  | 0.0070 | 1.55E-08 | KCNJ2   | 17q24.3  |
| 17  | 17:68214336 | 68214336 | A  | 0.2563 | 0.0454  | 0.0081 | 2.08E-08 | 46443.7 | 0.0469  | 0.0081 | 6.62E-09 | KCNJ2   | 17q24.3  |
| 17  | 17:68215574 | 68215574 | C  | 0.6999 | -0.0431 | 0.0077 | 1.76E-08 | 46640.4 | -0.0445 | 0.0077 | 6.65E-09 | KCNJ2   | 17q24.3  |
| 17  | 17:68216128 | 68216128 | A  | 0.2729 | 0.0465  | 0.0078 | 2.94E-09 | 48109.3 | 0.0479  | 0.0078 | 7.67E-10 | KCNJ2   | 17q24.3  |
| 17  | 17:68217231 | 68217231 | A  | 0.4146 | 0.0493  | 0.0071 | 3.79E-12 | 47456.7 | 0.0499  | 0.0071 | 1.90E-12 | KCNJ2   | 17q24.3  |
| 17  | 17:68217471 | 68217471 | T  | 0.7412 | -0.0462 | 0.008  | 8.14E-09 | 47309.8 | -0.0477 | 0.0080 | 2.30E-09 | KCNJ2   | 17q24.3  |
| 17  | 17:68217860 | 68217860 | T  | 0.4183 | 0.0466  | 0.0072 | 7.71E-11 | 46035.2 | 0.0476  | 0.0072 | 3.34E-11 | KCNJ2   | 17q24.3  |
| 17  | 17:68219001 | 68219001 | T  | 0.6028 | -0.048  | 0.0072 | 2.40E-11 | 46781.8 | -0.0487 | 0.0072 | 1.29E-11 | KCNJ2   | 17q24.3  |
| 17  | 17:68219033 | 68219033 | A  | 0.2544 | 0.0467  | 0.008  | 5.65E-09 | 47843.7 | 0.0482  | 0.0080 | 1.58E-09 | KCNJ2   | 17q24.3  |
| 17  | 17:68220218 | 68220218 | A  | 0.396  | 0.0479  | 0.0072 | 3.68E-11 | 46830.6 | 0.0486  | 0.0072 | 1.31E-11 | KCNJ2   | 17q24.3  |
| 17  | 17:68220226 | 68220226 | T  | 0.6053 | -0.0482 | 0.0072 | 2.36E-11 | 46883.4 | -0.0491 | 0.0072 | 8.56E-12 | KCNJ2   | 17q24.3  |
| 17  | 17:68220870 | 68220870 | T  | 0.3908 | 0.0479  | 0.0072 | 3.09E-11 | 47048.9 | 0.0488  | 0.0072 | 1.18E-11 | KCNJ2   | 17q24.3  |
| 17  | 17:68222505 | 68222505 | C  | 0.2993 | 0.0435  | 0.0077 | 1.39E-08 | 46711.1 | 0.0449  | 0.0077 | 5.01E-09 | KCNJ2   | 17q24.3  |
| 17  | 17:68231252 | 68231252 | A  | 0.7462 | -0.0452 | 0.008  | 1.68E-08 | 47920.4 | -0.0464 | 0.0080 | 6.15E-09 | KCNJ2   | 17q24.3  |
| 17  | 17:68235925 | 68235925 | T  | 0.7431 | -0.0453 | 0.008  | 1.59E-08 | 47539.3 | -0.0463 | 0.0080 | 6.40E-09 | KCNJ2   | 17q24.3  |
| 17  | 17:68237256 | 68237256 | T  | 0.7456 | -0.045  | 0.008  | 2.11E-08 | 47846.1 | -0.0461 | 0.0080 | 7.68E-09 | KCNJ2   | 17q24.3  |
| 17  | 17:68242546 | 68242546 | A  | 0.2529 | 0.0446  | 0.008  | 2.32E-08 | 48034   | 0.0456  | 0.0080 | 1.12E-08 | KCNJ2   | 17q24.3  |

**Supplementary Table 4. Genetic correlation of SK-BMD with different traits.** The genetic correlation was calculated based on the summary statistics of the only-Europeans meta-analysis in LD-Hub using its current datasets.

| Trait                                                       | rg      | se     | P        | PMID     |
|-------------------------------------------------------------|---------|--------|----------|----------|
| eBMD                                                        | 0.347   | 0.0459 | 4.03E-14 | 30598549 |
| LS-BMD                                                      | 0.604   | 0.0577 | 1.19E-25 | 26367794 |
| FN-BMD                                                      | 0.4761  | 0.061  | 5.88E-15 | 26367794 |
| Fracture                                                    | -0.38   | 0.06   | 1.17E-10 | 30158200 |
| Forearm-BMD                                                 | 0.7651  | 0.2149 | 1.76E-06 | 26367794 |
| Sit. height R                                               | 0.2753  | 0.0576 | 1.76E-06 | 25865494 |
| Infant HC                                                   | 0.2282  | 0.0703 | 0.0012   | 22504419 |
| IBD                                                         | -0.103  | 0.0351 | 0.0033   | 26192919 |
| Ulcerative colitis                                          | -0.1089 | 0.0404 | 0.007    | 26192919 |
| Hand grip                                                   | 0.08    | 0.03   | 0.0098   | 29313844 |
| App-leanmass                                                | 0.13    | 0.05   | 0.0108   | 28724990 |
| PGC cross-disorder analysis                                 | 0.1177  | 0.05   | 0.0185   | 23453885 |
| Body fat                                                    | -0.0873 | 0.041  | 0.0334   | 26833246 |
| Schizophrenia                                               | 0.0572  | 0.0304 | 0.0595   | 25056061 |
| Bipolar disorder                                            | 0.0871  | 0.0499 | 0.0808   | 21926972 |
| Extreme height                                              | -0.0652 | 0.039  | 0.0941   | 23563607 |
| Difference in height between childhood and adulthood; age 8 | -0.1005 | 0.0655 | 0.1253   | 23449627 |
| Crohns disease                                              | -0.0584 | 0.0398 | 0.1418   | 26192919 |
| Eczema                                                      | 0.0953  | 0.0668 | 0.1539   | 26482879 |
| Rheumatoid Arthritis                                        | -0.0593 | 0.0427 | 0.1645   | 24390342 |
| Waist circumference                                         | -0.0412 | 0.0304 | 0.1761   | 25673412 |
| Primary biliary cirrhosis                                   | 0.0841  | 0.0623 | 0.1774   | 26394269 |
| Child birth length                                          | -0.0885 | 0.0665 | 0.183    | 25281659 |
| Child birth weight                                          | -0.0762 | 0.0573 | 0.1832   | 23202124 |
| Overweight                                                  | 0.0413  | 0.0311 | 0.1839   | 23563607 |
| Difference in height between adolescence and adulthood; age | -0.0941 | 0.0709 | 0.1848   | 23449627 |
| Body mass index                                             | 0.0363  | 0.0281 | 0.1972   | 20935630 |
| Childhood obesity                                           | 0.0605  | 0.0494 | 0.2209   | 22484627 |
| Obesity class 1                                             | 0.0333  | 0.0292 | 0.2541   | 23563607 |
| Obesity class 3                                             | -0.0608 | 0.0558 | 0.2765   | 23563607 |
| Subjective well being                                       | 0.0453  | 0.0449 | 0.3129   | 27089181 |
| Waist-to-hip ratio                                          | -0.0316 | 0.033  | 0.3369   | 25673412 |
| Lung cancer (all)                                           | -0.0477 | 0.0532 | 0.3698   | 24880342 |
| Depressive symptoms                                         | 0.0371  | 0.0421 | 0.3783   | 27089181 |
| Extreme bmi                                                 | 0.0363  | 0.0449 | 0.4196   | 23563607 |
| Height_2010                                                 | -0.0223 | 0.0305 | 0.4646   | 20881960 |
| Hip circumference                                           | -0.0249 | 0.0347 | 0.4735   | 25673412 |

| <b>Trait</b>                                  | <b>rg</b> | <b>se</b> | <b>P</b> | <b>PMID</b> |
|-----------------------------------------------|-----------|-----------|----------|-------------|
| Systemic lupus erythematosus                  | 0.0367    | 0.0537    | 0.4942   | 26502338    |
| Mean Caudate                                  | -0.0279   | 0.0602    | 0.6431   | 25607358    |
| Birth weight                                  | -0.014    | 0.0347    | 0.687    | 27680694    |
| Major depressive disorder                     | 0.0224    | 0.0627    | 0.7211   | 22472876    |
| Lung cancer                                   | -0.0152   | 0.0521    | 0.7704   | 27488534    |
| Mean Putamen                                  | 0.014     | 0.0583    | 0.8103   | 25607358    |
| Height; Females at age 10 and males at age 12 | -0.0131   | 0.0548    | 0.8114   | 23449627    |
| Obesity class 2                               | -0.0089   | 0.0377    | 0.8133   | 23563607    |
| Anorexia Nervosa                              | -0.008    | 0.0387    | 0.8361   | 24514567    |
| Celiac disease                                | 0.0071    | 0.0682    | 0.9167   | 20190752    |
| Asthma                                        | 0.0064    | 0.0665    | 0.9234   | 17611496    |
| Extreme waist-to-hip ratio                    | 0.0064    | 0.068     | 0.9254   | 23563607    |
| Brain frontal lobe volume                     | -0.0007   | 0.0647    | 0.9909   | 31396565    |
| Brain temporal lobe volume                    | 0.0621    | 0.0733    | 0.3969   | 31396565    |
| Brain parietal lobe volume                    | -0.1103   | 0.0712    | 0.1212   | 31396565    |
| Brain occipital lobe volume                   | 0.0826    | 0.0638    | 0.196    | 31396565    |

**Supplementary Table 5. DEPICT Gene prioritization (FDR<5%).** Based on the genome-wide significant SNPs in the skull BMD GWAS (N=43,800). Top cis-eQTLs based on Westra et al.<sup>25</sup>. FDR= False Discovery Rate

| Locus     | Chromosome and position  | Gene ID         | Gene      | P value  | Gene closest to lead SNP | Top cis eQTL SNP                  | FDR    |
|-----------|--------------------------|-----------------|-----------|----------|--------------------------|-----------------------------------|--------|
| 1p13.2    | chr1:113009163-113258099 | ENSG00000155363 | MOV10     | 2.80E-03 | FALSE                    | rs3748656                         | <0.05  |
| 1q24.3    | chr1:171810621-172387606 | ENSG00000230630 | DNM3OS    | 2.17E-03 | TRUE                     | -                                 | <0.05  |
| 1q24.3    | chr1:171810621-172387606 | ENSG00000207949 | MIR214    | 3.75E-03 | FALSE                    | -                                 | <0.05  |
| 1p36.12   | chr1:22351681-22470462   | ENSG00000162552 | WNT4      | 2.85E-03 | TRUE                     | rs6688182                         | <0.05  |
| 2q14.2    | chr2:119599766-119605254 | ENSG00000163064 | EN1       | 1.01E-04 | TRUE                     | -                                 | <=0.01 |
| 2p11.2    | chr2:85360533-85537511   | ENSG00000152284 | TCF7L1    | 3.95E-03 | FALSE                    | -                                 | <0.05  |
| 4q22.1    | chr4:88742550-88767969   | ENSG00000152595 | MEPE      | 8.63E-06 | TRUE                     | -                                 | <=0.01 |
| 6q22.33   | chr6:127439749-127518910 | ENSG00000146374 | RSPO3     | 2.68E-04 | TRUE                     | -                                 | <0.05  |
| 6p21.1    | chr6:44777054-45518818   | ENSG00000124813 | RUNX2     | 2.54E-07 | TRUE                     | rs2772395                         | <=0.01 |
| 6q13      | chr6:7107830-7252213     | ENSG00000124782 | RREB1     | 4.56E-03 | TRUE                     | rs4960298;rs2714341;<br>rs6907319 | <0.05  |
| 8q24.12   | chr8:119935796-120118821 | ENSG00000164761 | TNFRSF11B | 3.03E-04 | TRUE                     | rs1389541                         | <0.05  |
| 11p14.1   | chr11:27352374-27899195  | ENSG00000109881 | CCDC34    | 1.24E-03 | TRUE                     | rs3781677                         | <0.05  |
| 11p14-p13 | chr11:27352374-27899195  | ENSG00000245573 | BDNF-AS1  | 1.83E-03 | TRUE                     | -                                 | <0.05  |
| 11p11.2   | chr11:46299212-47664175  | ENSG00000157613 | CREB3L1   | 3.29E-03 | FALSE                    | -                                 | <0.05  |
| 11q13.2   | chr11:68080077-68382802  | ENSG00000162337 | LRP5      | 3.27E-04 | FALSE                    | rs10750821                        | <0.05  |
| 12q13.12  | chr12:49372398-49375459  | ENSG00000125084 | WNT1      | 5.43E-03 | TRUE                     | -                                 | <0.05  |
| 12q13.12  | chr12:49388932-49463808  | ENSG00000167548 | MLL2      | 3.76E-03 | FALSE                    | -                                 | <0.05  |
| 12q13.12  | chr12:49672836-49692465  | ENSG00000257960 | -         | 8.52E-04 | FALSE                    | -                                 | <0.05  |
| 12q21.33  | chr12:90501516-90506066  | ENSG00000257194 | -         | 1.19E-03 | TRUE                     | -                                 | <0.05  |
| 17q21.31  | chr17:41831103-41940994  | ENSG00000167941 | SOST      | 4.19E-04 | FALSE                    | rs1731902                         | <0.05  |
| 20p12.2   | chr20:10618332-10654608  | ENSG00000101384 | JAG1      | 6.50E-04 | TRUE                     | rs8708                            | <0.05  |
| 20q12     | chr20:39314488-39317880  | ENSG00000204103 | MAFB      | 3.21E-04 | TRUE                     | rs2902941                         | <0.05  |

**Supplementary Table 6. DEPICT Gene-set enrichment analysis (FDR<5%).** These 194 gene-sets were further clustered in 28 'metagene-sets' shown in Figure 3a.

| Original gene set ID | Original gene set description                | P value  | FDR   | cluster         |
|----------------------|----------------------------------------------|----------|-------|-----------------|
| MP:0000164           | abnormal cartilage development               | 3.88E-09 | <0.01 | MP:0000164      |
| MP:0002113           | abnormal skeleton development                | 1.02E-08 | <0.01 | MP:0002113      |
| MP:0002115           | abnormal limb bone morphology                | 8.09E-08 | <0.01 | MP:0002115      |
| MP:0003723           | abnormal long bone morphology                | 1.41E-07 | <0.01 | MP:0000164      |
| MP:0000445           | short snout                                  | 3.12E-07 | <0.01 | MP:0000445      |
| GO:0016055           | Wnt receptor signaling pathway               | 4.91E-07 | <0.01 | GO:0016055      |
| MP:0004686           | decreased length of long bones               | 7.35E-07 | <0.01 | MP:0002113      |
| MP:0000088           | short mandible                               | 8.07E-07 | <0.01 | MP:0000445      |
| GO:0060070           | canonical Wnt receptor signaling pathway     | 9.14E-07 | <0.01 | GO:0016055      |
| MP:0000435           | shortened head                               | 1.42E-06 | <0.01 | MP:0000445      |
| GO:0030111           | regulation of Wnt receptor signaling pathway | 1.55E-06 | <0.01 | GO:0016055      |
| MP:0002114           | abnormal axial skeleton morphology           | 1.59E-06 | <0.01 | MP:0002115      |
| MP:0000150           | abnormal rib morphology                      | 1.66E-06 | <0.01 | MP:0002115      |
| MP:0002427           | disproportionate dwarf                       | 1.70E-06 | <0.01 | MP:0002113      |
| MP:0000063           | decreased bone mineral density               | 5.86E-06 | <0.01 | MP:0000063      |
| MP:0002111           | abnormal tail morphology                     | 6.50E-06 | <0.01 | MP:0002111      |
| MP:0000097           | short maxilla                                | 8.02E-06 | <0.01 | MP:0000445      |
| GO:0060349           | bone morphogenesis                           | 1.05E-05 | <0.01 | MP:0002111      |
| GO:0060350           | endochondral bone morphogenesis              | 1.21E-05 | <0.01 | MP:0002111      |
| MP:0005006           | abnormal osteoblast physiology               | 1.28E-05 | <0.01 | MP:0000063      |
| MP:0003935           | abnormal craniofacial development            | 1.52E-05 | <0.01 | MP:0003935      |
| GO:0001837           | epithelial to mesenchymal transition         | 1.64E-05 | <0.01 | GO:0001837      |
| MP:0003056           | abnormal hyoid bone morphology               | 1.73E-05 | <0.01 | MP:0000445      |
| GO:0001503           | ossification                                 | 1.84E-05 | <0.01 | GO:0001503      |
| GO:0001501           | skeletal system development                  | 2.17E-05 | <0.01 | MP:0002115      |
| MP:0004989           | decreased osteoblast cell number             | 2.35E-05 | <0.01 | MP:0000063      |
| ENSG00000143398      | PIP5K1A PPI subnetwork                       | 2.45E-05 | <0.01 | ENSG00000143398 |
| MP:0010029           | abnormal basicranium morphology              | 2.63E-05 | <0.01 | MP:0002115      |
| GO:0034504           | protein localization to nucleus              | 2.74E-05 | <0.01 | GO:0034504      |
| MP:0000137           | abnormal vertebrae morphology                | 3.27E-05 | <0.01 | MP:0002115      |
| MP:0000440           | domed cranium                                | 3.38E-05 | <0.01 | MP:0002113      |
| ENSG00000175387      | SMAD2 PPI subnetwork                         | 3.76E-05 | <0.01 | ENSG00000175387 |
| MP:0000266           | abnormal heart morphology                    | 3.86E-05 | <0.01 | MP:0000266      |
| MP:0000026           | abnormal inner ear morphology                | 4.16E-05 | <0.05 | MP:0000026      |
| GO:0048598           | embryonic morphogenesis                      | 4.24E-05 | <0.05 | GO:0048598      |
| MP:0000060           | delayed bone ossification                    | 4.90E-05 | <0.05 | GO:0001503      |
| ENSG00000106571      | GLI3 PPI subnetwork                          | 5.01E-05 | <0.05 | ENSG00000175387 |
| GO:0001649           | osteoblast differentiation                   | 5.07E-05 | <0.05 | GO:0001503      |

| Original gene set ID | Original gene set description                                         | P value  | FDR   | cluster         |
|----------------------|-----------------------------------------------------------------------|----------|-------|-----------------|
| MP:0000107           | abnormal frontal bone morphology                                      | 5.35E-05 | <0.05 | MP:0003935      |
| MP:0008271           | abnormal bone ossification                                            | 5.59E-05 | <0.05 | MP:0000063      |
| MP:0005508           | abnormal skeleton morphology                                          | 5.69E-05 | <0.05 | MP:0002115      |
| MP:0003408           | increased width of hypertrophic chondrocyte zone                      | 5.92E-05 | <0.05 | MP:0000063      |
| GO:0060348           | bone development                                                      | 6.02E-05 | <0.05 | MP:0002111      |
| KEGG_WNT_SIGNALING   | KEGG_WNT_SIGNALING_PATHWAY                                            | 6.04E-05 | <0.05 | GO:0016055      |
| MP:0000135           | decreased compact bone thickness                                      | 6.21E-05 | <0.05 | MP:0000063      |
| MP:0000165           | abnormal long bone hypertrophic chondrocyte zone                      | 6.28E-05 | <0.05 | MP:0002113      |
| GO:0060828           | regulation of canonical Wnt receptor signaling pathway                | 6.68E-05 | <0.05 | GO:0016055      |
| GO:0006606           | protein import into nucleus                                           | 6.99E-05 | <0.05 | GO:0034504      |
| MP:0000455           | abnormal maxilla morphology                                           | 7.17E-05 | <0.05 | MP:0000445      |
| MP:0000166           | abnormal chondrocyte morphology                                       | 7.41E-05 | <0.05 | MP:0002113      |
| MP:0003419           | delayed endochondral bone ossification                                | 7.63E-05 | <0.05 | MP:0000445      |
| MP:0000550           | abnormal forelimb morphology                                          | 7.81E-05 | <0.05 | MP:0000445      |
| ENSG00000179950      | PUF60 PPI subnetwork                                                  | 7.84E-05 | <0.05 | ENSG00000179950 |
| GO:0002062           | chondrocyte differentiation                                           | 8.13E-05 | <0.05 | MP:0002115      |
| MP:0000443           | abnormal snout morphology                                             | 9.00E-05 | <0.05 | MP:0003935      |
| ENSG00000167085      | PHB PPI subnetwork                                                    | 9.50E-05 | <0.05 | ENSG00000179950 |
| MP:0004462           | small basisphenoid bone                                               | 1.02E-04 | <0.05 | MP:0000445      |
| GO:0010770           | positive regulation of cell morphogenesis involved in differentiation | 1.03E-04 | <0.05 | GO:0001837      |
| GO:0051170           | nuclear import                                                        | 1.03E-04 | <0.05 | GO:0034504      |
| ENSG00000135547      | HEY2 PPI subnetwork                                                   | 1.18E-04 | <0.05 | ENSG00000135547 |
| MP:0003662           | abnormal long bone epiphyseal plate proliferative zone                | 1.22E-04 | <0.05 | MP:0002113      |
| MP:0000428           | abnormal craniofacial morphology                                      | 1.23E-04 | <0.05 | GO:0048598      |
| ENSG00000120659      | TNFSF11 PPI subnetwork                                                | 1.30E-04 | <0.05 | MP:0000266      |
| MP:0002657           | chondrodystrophy                                                      | 1.32E-04 | <0.05 | MP:0002113      |
| MP:0004986           | abnormal osteoblast morphology                                        | 1.35E-04 | <0.05 | MP:0000063      |
| MP:0006395           | abnormal epiphyseal plate morphology                                  | 1.36E-04 | <0.05 | MP:0002113      |
| MP:0005352           | small cranium                                                         | 1.44E-04 | <0.05 | MP:0000164      |
| MP:0002896           | abnormal bone mineralization                                          | 1.48E-04 | <0.05 | MP:0000063      |
| GO:0051098           | regulation of binding                                                 | 1.48E-04 | <0.05 | GO:0051098      |
| ENSG00000137693      | YAP1 PPI subnetwork                                                   | 1.49E-04 | <0.05 | MP:0000266      |
| GO:0051216           | cartilage development                                                 | 1.67E-04 | <0.05 | MP:0002115      |
| ENSG00000037965      | HOXC8 PPI subnetwork                                                  | 1.74E-04 | <0.05 | MP:0003935      |
| MP:0003055           | abnormal long bone epiphyseal plate morphology                        | 1.81E-04 | <0.05 | MP:0002113      |
| MP:0000049           | abnormal middle ear morphology                                        | 1.98E-04 | <0.05 | MP:0000049      |
| MP:0004359           | short ulna                                                            | 2.17E-04 | <0.05 | MP:0000164      |
| MP:0000914           | exencephaly                                                           | 2.41E-04 | <0.05 | GO:0048598      |
| MP:0000039           | abnormal otic capsule morphology                                      | 2.42E-04 | <0.05 | MP:0000049      |
| MP:0008396           | abnormal osteoclast differentiation                                   | 2.77E-04 | <0.05 | MP:0008396      |
| GO:0046822           | regulation of nucleocytoplasmic transport                             | 2.78E-04 | <0.05 | GO:0034504      |

| Original gene set ID | Original gene set description                                                                   | P value  | FDR   | cluster         |
|----------------------|-------------------------------------------------------------------------------------------------|----------|-------|-----------------|
| MP:0000130           | abnormal trabecular bone morphology                                                             | 2.79E-04 | <0.05 | MP:0000063      |
| ENSG00000206300      | ENSG00000206300 PPI subnetwork                                                                  | 2.85E-04 | <0.05 | ENSG00000206300 |
| ENSG00000204435      | CSNK2B PPI subnetwork                                                                           | 2.85E-04 | <0.05 | ENSG00000206300 |
| ENSG00000206406      | CSNK2B PPI subnetwork                                                                           | 2.85E-04 | <0.05 | ENSG00000206300 |
| MP:0004355           | short radius                                                                                    | 3.26E-04 | <0.05 | MP:0000164      |
| GO:0048568           | embryonic organ development                                                                     | 3.26E-04 | <0.05 | GO:0048598      |
| MP:0002100           | abnormal tooth morphology                                                                       | 3.31E-04 | <0.05 | MP:0002100      |
| MP:0000438           | abnormal cranium morphology                                                                     | 3.42E-04 | <0.05 | MP:0000445      |
| ENSG00000070770      | CSNK2A2 PPI subnetwork                                                                          | 3.54E-04 | <0.05 | ENSG00000206300 |
| MP:0000547           | short limbs                                                                                     | 3.56E-04 | <0.05 | MP:0002113      |
| MP:0002764           | short tibia                                                                                     | 3.76E-04 | <0.05 | MP:0000164      |
| MP:0004249           | abnormal crista ampullaris morphology                                                           | 3.77E-04 | <0.05 | MP:0000026      |
| GO:0019838           | growth factor binding                                                                           | 3.80E-04 | <0.05 | GO:0019838      |
| MP:0003795           | abnormal bone structure                                                                         | 3.95E-04 | <0.05 | MP:0000063      |
| GO:0000785           | chromatin                                                                                       | 3.99E-04 | <0.05 | ENSG00000175387 |
| MP:0004351           | short humerus                                                                                   | 4.03E-04 | <0.05 | MP:0000164      |
| GO:0042475           | odontogenesis of dentin-containing tooth                                                        | 4.05E-04 | <0.05 | MP:0002100      |
| MP:0002116           | abnormal craniofacial bone morphology                                                           | 4.08E-04 | <0.05 | MP:0000445      |
| ENSG00000115844      | DLX2 PPI subnetwork                                                                             | 4.09E-04 | <0.05 | MP:0003935      |
| GO:0090101           | negative regulation of transmembrane receptor protein serine/threonine kinase signaling pathway | 4.12E-04 | <0.05 | GO:0001837      |
| MP:0008395           | abnormal osteoblast differentiation                                                             | 4.32E-04 | <0.05 | MP:0000063      |
| GO:0030178           | negative regulation of Wnt receptor signaling pathway                                           | 4.33E-04 | <0.05 | GO:0016055      |
| MP:0000131           | abnormal long bone epiphysis morphology                                                         | 4.35E-04 | <0.05 | MP:0002113      |
| GO:0001958           | endochondral ossification                                                                       | 4.42E-04 | <0.05 | MP:0002111      |
| ENSG00000167258      | CDK12 PPI subnetwork                                                                            | 4.44E-04 | <0.05 | ENSG00000206300 |
| MP:0000133           | abnormal long bone metaphysis morphology                                                        | 4.64E-04 | <0.05 | MP:0002113      |
| MP:0002544           | brachydactyly                                                                                   | 4.74E-04 | <0.05 | MP:0002115      |
| ENSG00000138685      | FGF2 PPI subnetwork                                                                             | 4.75E-04 | <0.05 | GO:0019838      |
| MP:0009887           | abnormal palatal shelf fusion at midline                                                        | 4.82E-04 | <0.05 | MP:0000445      |
| GO:0003170           | heart valve development                                                                         | 4.87E-04 | <0.05 | ENSG00000135547 |
| GO:0060562           | epithelial tube morphogenesis                                                                   | 4.92E-04 | <0.05 | GO:0048598      |
| MP:0003054           | spina bifida                                                                                    | 4.92E-04 | <0.05 | GO:0048598      |
| GO:0048729           | tissue morphogenesis                                                                            | 4.99E-04 | <0.05 | GO:0048598      |
| MP:0003109           | short femur                                                                                     | 5.03E-04 | <0.05 | MP:0000164      |
| ENSG00000005339      | CREBBP PPI subnetwork                                                                           | 5.06E-04 | <0.05 | ENSG00000175387 |
| MP:0003718           | maternal effect                                                                                 | 5.08E-04 | <0.05 | MP:0003718      |
| ENSG00000070814      | TCOF1 PPI subnetwork                                                                            | 5.11E-04 | <0.05 | ENSG00000179950 |
| ENSG00000112062      | MAPK14 PPI subnetwork                                                                           | 5.42E-04 | <0.05 | ENSG00000175387 |
| GO:0051090           | regulation of sequence-specific DNA binding transcription factor activity                       | 5.46E-04 | <0.05 | ENSG00000175387 |
| MP:0008525           | decreased cranium height                                                                        | 5.52E-04 | <0.05 | MP:0000445      |
| MP:0001891           | hydrocephaly                                                                                    | 5.60E-04 | <0.05 | GO:0048598      |
| MP:0002237           | abnormal nasal cavity morphology                                                                | 5.64E-04 | <0.05 | MP:0000445      |



| Original gene set ID | Original gene set description                          | P value  | FDR   | cluster         |
|----------------------|--------------------------------------------------------|----------|-------|-----------------|
| GO:0008134           | transcription factor binding                           | 5.76E-04 | <0.05 | ENSG00000175387 |
| MP:0000109           | abnormal parietal bone morphology                      | 5.88E-04 | <0.05 | MP:0003935      |
| GO:0048705           | skeletal system morphogenesis                          | 6.01E-04 | <0.05 | MP:0002115      |
| MP:0005296           | abnormal humerus morphology                            | 6.11E-04 | <0.05 | MP:0000164      |
| GO:0005667           | transcription factor complex                           | 6.21E-04 | <0.05 | ENSG00000175387 |
| MP:0004704           | short vertebral column                                 | 6.28E-04 | <0.05 | MP:0000164      |
| GO:0048762           | mesenchymal cell differentiation                       | 6.33E-04 | <0.05 | GO:0001837      |
| GO:0030278           | regulation of ossification                             | 6.37E-04 | <0.05 | GO:0001503      |
| MP:0005157           | holoprosencephaly                                      | 6.39E-04 | <0.05 | GO:0048598      |
| GO:0033365           | protein localization to organelle                      | 6.41E-04 | <0.05 | GO:0034504      |
| GO:0014031           | mesenchymal cell development                           | 6.43E-04 | <0.05 | GO:0001837      |
| GO:0048634           | regulation of muscle organ development                 | 6.53E-04 | <0.05 | GO:0001837      |
| GO:0045597           | positive regulation of cell differentiation            | 6.61E-04 | <0.05 | GO:0048598      |
| MP:0005105           | abnormal middle ear ossicle morphology                 | 6.77E-04 | <0.05 | MP:0000049      |
| MP:0005358           | abnormal incisor morphology                            | 6.79E-04 | <0.05 | MP:0002100      |
| MP:0008023           | abnormal styloid process morphology                    | 6.89E-04 | <0.05 | MP:0000049      |
| GO:0030282           | bone mineralization                                    | 6.90E-04 | <0.05 | GO:0001503      |
| REACTOME_SHC:MEDIA   | REACTOME_SHC:MEDIATED_CASCADE                          | 6.96E-04 | <0.05 | MP:0000266      |
| MP:0003560           | osteoarthritis                                         | 7.07E-04 | <0.05 | MP:0000063      |
| GO:0051130           | positive regulation of cellular component organization | 7.12E-04 | <0.05 | MP:0000266      |
| ENSG00000188313      | PLSCR1 PPI subnetwork                                  | 7.12E-04 | <0.05 | ENSG00000188313 |
| MP:0006398           | increased long bone epiphyseal plate size              | 7.12E-04 | <0.05 | MP:0000063      |
| MP:0002908           | delayed wound healing                                  | 7.19E-04 | <0.05 | MP:0000063      |
| ENSG00000111186      | WNT5B PPI subnetwork                                   | 7.27E-04 | <0.05 | ENSG00000111186 |
| MP:0008947           | increased neuron number                                | 7.27E-04 | <0.05 | MP:0002100      |
| ENSG00000105329      | TGFB1 PPI subnetwork                                   | 7.35E-04 | <0.05 | GO:0019838      |
| GO:0019901           | protein kinase binding                                 | 7.53E-04 | <0.05 | ENSG00000175387 |
| GO:0009968           | negative regulation of signal transduction             | 7.54E-04 | <0.05 | GO:0016055      |
| MP:0001614           | abnormal blood vessel morphology                       | 7.71E-04 | <0.05 | GO:0019838      |
| MP:0000556           | abnormal hindlimb morphology                           | 7.75E-04 | <0.05 | MP:0000445      |
| ENSG00000181789      | COPG PPI subnetwork                                    | 7.89E-04 | <0.05 | ENSG00000179950 |
| MP:0000458           | abnormal mandible morphology                           | 8.55E-04 | <0.05 | MP:0000445      |
| MP:0011101           | partial prenatal lethality                             | 8.61E-04 | <0.05 | MP:0000266      |
| MP:0000036           | absent semicircular canals                             | 8.62E-04 | <0.05 | MP:0000026      |
| MP:0000163           | abnormal cartilage morphology                          | 8.77E-04 | <0.05 | MP:0000445      |
| GO:0048562           | embryonic organ morphogenesis                          | 8.80E-04 | <0.05 | GO:0048598      |
| GO:0005520           | insulin-like growth factor binding                     | 9.06E-04 | <0.05 | GO:0019838      |
| MP:0000559           | abnormal femur morphology                              | 9.12E-04 | <0.05 | MP:0000063      |
| ENSG00000147202      | DIAPH2 PPI subnetwork                                  | 9.46E-04 | <0.05 | ENSG00000175387 |
| GO:0033157           | regulation of intracellular protein transport          | 9.47E-04 | <0.05 | GO:0034504      |
| MP:0004136           | abnormal tongue muscle morphology                      | 9.52E-04 | <0.05 | MP:0000049      |

| Original gene set ID | Original gene set description          | P value  | FDR   | cluster         |
|----------------------|----------------------------------------|----------|-------|-----------------|
| GO:0017038           | protein import                         | 9.62E-04 | <0.05 | GO:0034504      |
| ENSG00000185721      | DRG1 PPI subnetwork                    | 9.75E-04 | <0.05 | ENSG00000179950 |
| GO:0051101           | regulation of DNA binding              | 9.75E-04 | <0.05 | GO:0051098      |
| MP:0008151           | increased diameter of long bones       | 9.79E-04 | <0.05 | MP:0002113      |
| ENSG00000115808      | STRN PPI subnetwork                    | 9.92E-04 | <0.05 | ENSG00000179950 |
| GO:0035108           | limb morphogenesis                     | 1.00E-03 | <0.05 | GO:0048598      |
| GO:0035107           | appendage morphogenesis                | 1.00E-03 | <0.05 | GO:0048598      |
| GO:0043392           | negative regulation of DNA binding     | 1.00E-03 | <0.05 | GO:0051098      |
| MP:0003148           | decreased cochlear coiling             | 1.01E-03 | <0.05 | MP:0000026      |
| ENSG00000134245      | WNT2B PPI subnetwork                   | 1.03E-03 | <0.05 | ENSG00000111186 |
| GO:0060021           | palate development                     | 1.04E-03 | <0.05 | MP:0002115      |
| MP:0001541           | abnormal osteoclast physiology         | 1.06E-03 | <0.05 | MP:0008396      |
| ENSG00000164107      | HAND2 PPI subnetwork                   | 1.08E-03 | <0.05 | ENSG00000135547 |
| MP:0001698           | decreased embryo size                  | 1.08E-03 | <0.05 | ENSG00000175387 |
| GO:0006913           | nucleocytoplasmic transport            | 1.10E-03 | <0.05 | GO:0034504      |
| KEGG_PATHWAYS_IN_C   | KEGG_PATHWAYS_IN_CANCER                | 1.11E-03 | <0.05 | MP:0000266      |
| ENSG00000104689      | TNFRSF10A PPI subnetwork               | 1.12E-03 | <0.05 | ENSG00000104689 |
| ENSG00000115053      | NCL PPI subnetwork                     | 1.12E-03 | <0.05 | ENSG00000179950 |
| ENSG00000170315      | UBB PPI subnetwork                     | 1.14E-03 | <0.05 | ENSG00000179950 |
| MP:0004993           | decreased bone resorption              | 1.18E-03 | <0.05 | MP:0008396      |
| ENSG00000101266      | CSNK2A1 PPI subnetwork                 | 1.19E-03 | <0.05 | ENSG00000206300 |
| GO:0060485           | mesenchyme development                 | 1.20E-03 | <0.05 | GO:0001837      |
| MP:0001394           | circling                               | 1.21E-03 | <0.05 | MP:0000026      |
| MP:0000079           | abnormal basioccipital bone morphology | 1.22E-03 | <0.05 | MP:0002115      |
| ENSG00000139219      | COL2A1 PPI subnetwork                  | 1.22E-03 | <0.05 | MP:0000063      |
| KEGG_TGF_BETA_SIGNA  | KEGG_TGF_BETA_SIGNALING_PATHWAY        | 1.22E-03 | <0.05 | GO:0001503      |
| GO:0000118           | histone deacetylase complex            | 1.24E-03 | <0.05 | ENSG00000175387 |
| GO:0051169           | nuclear transport                      | 1.25E-03 | <0.05 | GO:0034504      |
| ENSG00000115596      | WNT6 PPI subnetwork                    | 1.26E-03 | <0.05 | ENSG00000111186 |
| MP:0005587           | abnormal Meckel's cartilage morphology | 1.27E-03 | <0.05 | MP:0000445      |
| MP:0006030           | abnormal otic vesicle development      | 1.27E-03 | <0.05 | MP:0000026      |
| MP:0000454           | abnormal jaw morphology                | 1.27E-03 | <0.05 | MP:0000445      |

**Supplementary Table 7. eQTL and Colocalization of signals associated with Skull BMD and Osteoclast expression.** Showing only results for markers where eQTL analysis FDR<0.05. P=P-value eQTL analysis; PP\_H3=Posterior probability that two SNPs in high linkage disequilibrium are underlying the association with osteoclast gene expression and skull BMD variation; PP\_H4=Posterior probability that a single SNP is underlying the association with osteoclast gene expression and skull BMD variation. eQTLs with PP4 greater than 50% are written in bold font.

| Locus   | SNP               | Gene         | eQTL analysis |                 |               |               | Colocalization analysis |                         |
|---------|-------------------|--------------|---------------|-----------------|---------------|---------------|-------------------------|-------------------------|
|         |                   |              | Distance      | P               | Slope         | FDR           | PP_H3                   | PP_H4                   |
| 1p13.2  | rs55652172        | ST7L         | -15841        | 5.30E-09        | 0.922         | 3.33E-07      | 99.90%                  | 1.62x10 <sup>-3</sup> % |
| 1p36.12 | rs7526484         | LINC00339    | 100821        | 6.29E-06        | -0.652        | 3.68E-04      | 99.99%                  | 1.95x10 <sup>-8</sup> % |
| 1p36.12 | rs7526484         | CDC42        | 72725         | 0.0015          | -0.360        | 0.0432        | 65.60%                  | 5.11%                   |
| 5q22.2  | <b>rs454968</b>   | <b>REEP5</b> | <b>-69781</b> | <b>5.68E-04</b> | <b>-0.358</b> | <b>0.0166</b> | <b>24.20%</b>           | <b>62.70%</b>           |
| 7q31.31 | rs2908004         | ING3         | 378966        | 0.0033          | 0.365         | 0.0486        | 19.70%                  | 5.55%                   |
| 11p15.5 | <b>rs56257551</b> | <b>RIC8A</b> | <b>52064</b>  | <b>1.26E-04</b> | <b>-0.749</b> | <b>0.0151</b> | <b>12.50%</b>           | <b>52.50%</b>           |

**Supplementary Table 8. SMR analysis for eQTL and signals associated with Skull BMD.** Showing only results for markers where eQTL analysis  $P < 5 \times 10^{-8}$ . Frequency [Freq] and effect size [beta] are given for A1.  $P = P$ .value; nsnp=Number of SNPs. Markers with HEIDI results  $P > 0.05$ , supporting the hypothesis that a unique SNP is underlying the eQTL and Skull-BMD association are written in bold font

| Locus   | Gene             | topSNP           | A1       | A2       | Freq         | beta_GWAS     | P_GWAS          | beta_eQTL     | P_eQTL           | beta_SMR      | P_SMR           | P_HEIDI      | nsnp_HEIDI | Tissue/Cell |
|---------|------------------|------------------|----------|----------|--------------|---------------|-----------------|---------------|------------------|---------------|-----------------|--------------|------------|-------------|
| 1p36.12 | CDC42            | rs2268177        | T        | A        | 0.155        | -0.095        | 7.43E-25        | 0.847         | 1.09E-298        | -0.112        | 2.66E-23        | 3.27E-22     | 20         | Blood       |
| 1p13.2  | <b>MOV10</b>     | <b>rs3748656</b> | <b>T</b> | <b>C</b> | <b>0.143</b> | <b>0.046</b>  | <b>1.13E-07</b> | <b>0.248</b>  | <b>2.89E-26</b>  | <b>0.186</b>  | <b>2.05E-06</b> | <b>0.221</b> | <b>15</b>  | Blood       |
| 6p21.1  | <b>SUPT3H</b>    | <b>rs9369523</b> | <b>C</b> | <b>T</b> | <b>0.404</b> | <b>0.039</b>  | <b>1.35E-07</b> | <b>-0.237</b> | <b>6.18E-34</b>  | <b>-0.164</b> | <b>1.48E-06</b> | <b>0.129</b> | <b>20</b>  | Blood       |
| 7q31.31 | CPED1            | rs1949803        | G        | T        | 0.478        | -0.053        | 4.69E-13        | 0.271         | 5.67E-46         | -0.193        | 1.37E-10        | 7.59E-21     | 20         | Blood       |
| 8q22.3  | AZIN1            | rs1062315        | T        | A        | 0.320        | -0.041        | 1.32E-07        | -0.320        | 1.06E-54         | 0.127         | 6.25E-07        | 0.009        | 20         | Blood       |
| 8q22.3  | <b>AZIN1-AS1</b> | <b>rs1055376</b> | <b>A</b> | <b>G</b> | <b>0.410</b> | <b>-0.043</b> | <b>4.79E-09</b> | <b>-0.207</b> | <b>4.90E-25</b>  | <b>0.209</b>  | <b>3.72E-07</b> | <b>0.209</b> | <b>20</b>  | Blood       |
| 11p15.5 | SCGB1C1          | rs11602954       | A        | G        | 0.180        | 0.045         | 5.18E-07        | 0.419         | 6.28E-77         | 0.107         | 1.38E-06        | 0.032        | 20         | Blood       |
| 11p15.5 | BET1L            | rs505404         | G        | T        | 0.196        | 0.045         | 5.74E-08        | 0.193         | 3.52E-17         | 0.231         | 4.71E-06        | 0.001        | 19         | Blood       |
| 11q13.3 | TESMIN           | rs2513272        | C        | T        | 0.298        | -0.042        | 9.60E-08        | -0.225        | 1.66E-26         | 0.186         | 1.69E-06        | 3.88E-05     | 20         | Blood       |
| 11q13.3 | CPT1A            | rs3136547        | C        | G        | 0.283        | -0.042        | 6.18E-08        | -0.257        | 4.19E-34         | 0.165         | 7.27E-07        | 2.66E-06     | 20         | Blood       |
| 12q23.3 | <b>TMEM263</b>   | <b>rs2888893</b> | <b>C</b> | <b>T</b> | <b>0.460</b> | <b>-0.045</b> | <b>1.49E-10</b> | <b>0.151</b>  | <b>4.98E-15</b>  | <b>-0.301</b> | <b>7.34E-07</b> | <b>0.263</b> | <b>20</b>  | Blood       |
| 14q24.3 | <b>EIF2B2</b>    | <b>rs175016</b>  | <b>T</b> | <b>C</b> | <b>0.441</b> | <b>-0.036</b> | <b>6.02E-07</b> | <b>-0.622</b> | <b>1.78E-278</b> | <b>0.058</b>  | <b>7.89E-07</b> | <b>0.877</b> | <b>20</b>  | Blood       |
| 14q24.3 | <b>MLH3</b>      | <b>rs13712</b>   | <b>T</b> | <b>C</b> | <b>0.441</b> | <b>-0.036</b> | <b>5.53E-07</b> | <b>-0.285</b> | <b>8.73E-51</b>  | <b>0.126</b>  | <b>2.23E-06</b> | <b>0.860</b> | <b>20</b>  | Blood       |
| 16p13.3 | DECR2            | rs1698231        | C        | T        | 0.503        | -0.034        | 3.96E-06        | 0.405         | 1.57E-103        | -0.084        | 6.99E-06        | 0.008        | 20         | Blood       |
| 20q12   | <b>MAFB</b>      | <b>rs2902941</b> | <b>G</b> | <b>A</b> | <b>0.360</b> | <b>0.039</b>  | <b>2.40E-07</b> | <b>0.185</b>  | <b>8.30E-20</b>  | <b>0.213</b>  | <b>6.89E-06</b> | <b>0.141</b> | <b>20</b>  | Blood       |
| 1p36.12 | LINC00339        | rs2501289        | C        | G        | 0.332        | 0.052         | 1.05E-11        | -1.072        | 3.35E-22         | -0.049        | 2.56E-08        | 1.47E-10     | 20         | Osteoclast  |
| 16p13.3 | TMEM8A           | rs8064205        | G        | A        | 0.460        | 0.040         | 2.63E-08        | -0.731        | 1.34E-10         | -0.055        | 2.72E-05        | 1.63E-08     | 20         | Osteoclast  |

**Supplementary Table 9. Capture C interaction data from hMSC-derived osteoblasts.** Cells were obtained from 3 independent donors. Significant calls from CHiCAGO with CHiCAGO score  $\geq 5$  are reported for the Skull BMD GWAS loci , using open proxies with  $r^2 \geq 0.4$ .

| LOCUS   | SENTINEL_SNP | PROXY_SNP (R2)                       | SNP_POSITION                 | SNP_FRAGMENT             | IMPLICATED_GENE                | BAIT      | DISTANCE_SNP_BAIT | NUM_READS | CHICAGO_SCORE | RESOLUTION |
|---------|--------------|--------------------------------------|------------------------------|--------------------------|--------------------------------|-----------|-------------------|-----------|---------------|------------|
| CCDC91  | rs10843202   | rs35098487 (0.56)                    | chr12:28343976               | chr12:28342813-28345036  | TCONS_00021090                 | chr12:287 | 380543            | 6         | 5.54          | 4frag      |
| CFAP221 | rs11679232   | rs62159869 (0.89)                    | chr2:119613117               | chr2:119612492-119613570 | TCONS_l2_00014855              | chr2:1189 | 647079            | 7         | 6.27          | 4frag      |
| CFAP221 | rs11679232   | rs62159869 (0.89)                    | chr2:119613117               | chr2:119612492-119613570 | TCONS_00003829                 | chr2:1189 | 628957            | 5         | 7.12          | 4frag      |
| DEPTOR  | rs7842942    | rs13277230 (0.70)                    | chr8:119922993               | chr8:119921858-119925117 | TNFRSF11B/COLEC10              | chr8:1200 | 155622            | 18        | 10.66         | 4frag      |
| DNM3    | rs495590     | rs562932 (0.70)                      | chr1:172150960               | chr1:172149458-172152278 | C1orf105                       | chr1:1723 | 237005            | 6         | 5.18          | 4frag      |
| FAM13A  | rs11934731   | rs13127257 (0.41)                    | chr4:88765516                | chr4:88764918-88766746   | SPARCL1                        | chr4:8844 | 312853            | 7         | 7.83          | 4frag      |
| FAM13A  | rs11934731   | rs13127257 (0.41)                    | chr4:88765516                | chr4:88764918-88766746   | DMP1                           | chr4:8857 | 193743            | 12        | 10.93         | 4frag      |
| KMT5B   | rs11228240   | rs901823 (0.56)                      | chr11:68205578               | chr11:68203432-68207950  | TCONS_00019360                 | chr11:680 | 155210            | 5         | 5.66          | 4frag      |
| LRIG2   | rs55652172   | rs12122980 (0.94)                    | chr1:113157181               | chr1:113156543-113157221 | CTTNBP2NL                      | chr1:1129 | 217085            | 4         | 6.19          | 1frag      |
| LRIG2   | rs55652172   | rs12122980 (0.94)                    | chr1:113157181               | chr1:113156413-113157724 | MIR4256                        | chr1:1130 | 152439            | 6         | 7.03          | 4frag      |
| LRIG2   | rs55652172   | rs2279499 (0.79)                     | chr1:113247563               | chr1:113246392-113247910 | CTTNBP2NL                      | chr1:1129 | 307467            | 4         | 6.62          | 1frag      |
| LRIG2   | rs55652172   | rs2279499 (0.79)                     | chr1:113247563               | chr1:113246392-113247910 | WNT2B                          | chr1:1130 | 237706            | 3         | 5.26          | 1frag      |
| MAT2A   | rs11675489   | rs6547609 (0.40)                     | chr2:85512675                | chr2:85512519-85512877   | TCF7L1                         | chr2:8535 | 151755            | 5         | 9.23          | 1frag      |
| POSTN   | rs493248     | rs17217404 (0.99)                    | chr13:37466215               | chr13:37465828-37466760  | SMAD9                          | chr13:374 | 27217             | 6         | 5.13          | 1frag      |
| RIMS2   | rs11993347   | rs2916559 (0.43)                     | chr8:103827084               | chr8:103825579-103827745 | ODF1                           | chr8:1035 | 262404            | 6         | 5.86          | 4frag      |
| SMG6    | rs4790881    | rs35401268 (0.87)                    | chr17:2026417                | chr17:2026042-2027041    | SMG6                           | chr17:199 | 34079             | 6         | 6.12          | 1frag      |
| SMG6    | rs4790881    | rs35401268 (0.87)                    | chr17:2026417                | chr17:2023679-2027041    | LOC101927839                   | chr17:213 | 107825            | 13        | 18.09         | 4frag      |
| SMG6    | rs4790881    | rs148183711 (0.79)                   | chr17:2118506                | chr17:2117462-2118920    | LOC101927839                   | chr17:213 | 15736             | 16        | 6.84          | 4frag      |
| SUPT3H  | rs17423748   | rs3799973 (0.42)                     | chr6:44823727                | chr6:44822963-44824144   | RUNX2                          | chr6:4529 | 471540            | 5         | 6.35          | 1frag      |
| ZBTB40  | rs7526484    | rs34446016 (0.42)                    | chr1:22458637                | chr1:22458035-22458666   | WNT4                           | chr1:2246 | 9977              | 10        | 5.46          | 1frag      |
| ZBTB40  | rs7526484    | rs742358 (0.45)                      | chr1:22459170                | chr1:22458667-22459843   | WNT4                           | chr1:2246 | 9444              | 10        | 5.23          | 1frag      |
| ZNF366  | rs11948073   | rs10805874 (0.49), rs12517173 (0.87) | chr5:72607981, chr5:72607398 | chr5:72606661-72610093   | TCONS_00009420, TCONS_00009421 | chr5:7258 | 20069; 19486      | 23        | 6.94          | 4frag      |
| ZNF366  | rs11948073   | rs10805874 (0.49), rs12517173 (0.87) | chr5:72607981, chr5:72607398 | chr5:72607278-72609451   | TCONS_00009423 (FOXO1-AS)      | chr5:7274 | 133923; 134506    | 6         | 8.92          | 1frag      |
| ZNF366  | rs11948073   | rs368996568 (1.00)                   | chr5:72618031                | chr5:72617174-72618214   | TCONS_00009423 (FOXO1-AS)      | chr5:7274 | 123873            | 4         | 5.23          | 1frag      |

**Supplementary Table 10. Site-specific BMD measurements of fish of similar standard size.** Values of whole body and skull BMD for *zic1* (n=6), *atp6v1c1* (*a+b*) (n=3) crispants and controls (n=6) and *prkar1a* (*a+b*) crispants (n=3) and controls (n=3). Values are reported as g/cm<sup>3</sup>. Data source for Figure 4e-h.

| <b>control</b> | <b>zic1</b>    | <b>atp6v1c1</b> |  | <b>Whole body BMD</b> |  |
|----------------|----------------|-----------------|--|-----------------------|--|
| 0.44907        | 0.38539        | 0.3805          |  |                       |  |
| 0.45064        | 0.4255         | 0.33498         |  |                       |  |
| 0.42857        | 0.35351        | 0.36065         |  |                       |  |
| 0.40161        | 0.32893        |                 |  |                       |  |
| 0.41412        | 0.36018        |                 |  |                       |  |
| 0.40098        | 0.33301        |                 |  |                       |  |
|                |                |                 |  |                       |  |
|                |                |                 |  |                       |  |
| <b>control</b> | <b>prkar1a</b> |                 |  | <b>Whole body BMD</b> |  |
| 0.37673        | 0.45409        |                 |  |                       |  |
| 0.40349        | 0.43239        |                 |  |                       |  |
| 0.40252        | 0.42593        |                 |  |                       |  |
|                |                |                 |  |                       |  |
|                |                |                 |  |                       |  |
| <b>control</b> | <b>zic1</b>    | <b>atp6v1c1</b> |  | <b>Skull BMD</b>      |  |
| 0.4593         | 0.39927        | 0.3953          |  |                       |  |
| 0.45927        | 0.42016        | 0.39008         |  |                       |  |
| 0.44611        | 0.38208        | 0.38937         |  |                       |  |
| 0.41279        | 0.38376        |                 |  |                       |  |
| 0.42119        | 0.38795        |                 |  |                       |  |
| 0.41218        | 0.36538        |                 |  |                       |  |
|                |                |                 |  |                       |  |
|                |                |                 |  |                       |  |
| <b>control</b> | <b>prkar1a</b> |                 |  | <b>Skull BMD</b>      |  |
| 0.4033         | 0.45777        |                 |  |                       |  |
| 0.41266        | 0.43499        |                 |  |                       |  |
| 0.42349        | 0.44271        |                 |  |                       |  |

**Supplementary Table 11. CRISPR/CAs9 targeting sequences**

| <b>Gene/ gRNA name</b> | <b>Target Sequence 5'-3' (without PAM)</b> | <b>PAM</b> | <b>Exon Targeted</b> | <b>Position danRer11/zebrafish</b> |
|------------------------|--------------------------------------------|------------|----------------------|------------------------------------|
| zic1_cr1               | GGGAAGAGTGC GGCCGGGAA                      | GGG        | 1                    | chr24:4972675-4972697              |
| zic1_cr2               | TGGGAAGAGTGC GGCCGGGA                      | AGG        | 1                    | chr24:4972676-4972698              |
| zic1_cr3               | GATTTTCAGATTTTCCGATC                       | GGG        | 1                    | chr24:4972552-4972574              |
| atp6v1C1a_cr1          | GAGTCTGTTGACCAGGAGTT                       | TGG        | 7                    | chr16:52757882-52757904            |
| atp6v1C1a_cr2          | AGACGACTTTGTGCTGGATT                       | CGG        | 7                    | chr16:52757921-52757943            |
| atp6v1C1a_cr3          | AGTGGTACCAAAGTAAGTGA                       | CGG        | 7                    | chr16:52757966-52757988            |
| atp6v1C1b_cr4          | TACATTACCCGGTTCCAGT                        | GGG        | 5                    | chr19:32953948                     |
| atp6v1C1b_cr5          | GCTGATATAGTCAAGAAGG                        | AGG        | 5                    | chr19:32954332                     |
| atp6v1C1b_cr6          | ATACATTACCCGGTTCCAG                        | TGG        | 5                    | chr19:32953947                     |
| prkar1a_a_cr1          | AGTCTCTGAGGTAAGCCAT                        | GGG        | 3                    | chr3:36268843                      |
| prkar1a_a_cr2          | AGTGCAGAGGTCTACTG                          | AGG        | 3                    | chr3:36268573                      |
| prkar1a_a_cr3          | CCGTCGGCCTTTAACCACA                        | GGG        | 3                    | chr3:36268610                      |
| prkar1a_b_cr4          | GCGACCAGCATTGGCGAGGG                       | CGG        | 7                    | chr12:2881146-2881168              |
| prkar1a_b_cr5          | GGTCTTGGCTCTGACGGTGG                       | CGG        | 7                    | chr12:2881210-2881232              |
| prkar1a_b_cr6          | GGAGAGCTGGCGTTAATCTA                       | CGG        | 7                    | chr12:2881176-2881198              |

**Supplementary Table 12. Primers used for fragment length analysis**

| gene and gRNAs | M13+F                | R                            | Amplicon sequence                                                                                                                                                                                                                                                                                                                                                                                                                                                                                                    | amplicon |
|----------------|----------------------|------------------------------|----------------------------------------------------------------------------------------------------------------------------------------------------------------------------------------------------------------------------------------------------------------------------------------------------------------------------------------------------------------------------------------------------------------------------------------------------------------------------------------------------------------------|----------|
| zic1_exon1     | TGTA AACCGACGGCCA GT | ACCTCTTCATTA AAAACTAGGAATGAA | >chr24:4972471-4972771 301bp TATGCACGAGCTTGTGACCC<br>ACCTCTTCATTA AAAACTAGGAATGAA<br>TATGCACGAGCTTGTGACCCatctgacttagagcacgttgggggaccag<br>agcagtcgaatcacattgtcttttgggaagagtcgcccgggaaggga<br>ccgtttaagcaaaataaaacttggatcatatcagagttcacacggg<br>agagaaaccgtttccgtgtccattccccggctgtggaaaagtattgcc<br>gatcggaaaatctgaaaatccacaaaagaacacacacagtaagaaaatc<br>gttatttcatctctaaatacacgTTCATTCTAGTTTTTAATGAAGAGGT                                                                                                            | 301      |
| atp6v1C1_a     | TGTA AACCGACGGCCA GT | AATGTGAGAGCTGGTGGTCC         | >chr16:52757779-52758081 303bp ACACACTGTGAGCATGTGCA<br>AATGTGAGAGCTGGTGGTCC<br>ACACACTGTGAGCATGTGCAtaagagcaattcaggagttgtgtgactgtc<br>ttcaaatatttccagactgttctttttgtgttgaggaaatccgtcac<br>ttactttggtaccactacaagtaaatgaggtagctccgaatccagca<br>caaagtcgtcttctgacaatatcagccaaactcctggtcaacagactc<br>cctctgatgacaacacaaaaccacagcttagttgattggaaaaggctatg<br>tccatacaagtgtctcaagtaagttcgggaGGACCACGACTCTCACATT                                                                                                               | 303      |
| atp6v1C1_b     | TGTA AACCGACGGCCA GT | CCGGTTCCAGTGGGATATGG         | >chr19:32953956-32954370 415bp AGAGTCCAACACAAAATCCTCCT<br>CCGGTTCCAGTGGGATATGGAGAGTCCAACACAAAATCCTCCTtctgactatcagc<br>caaaactcctagtcaaaagactcctctggtgggcaagacatgttactcagatattt<br>aaaacatcattaatgttcaagtaaaactgaaaataaaaaagtcacac<br>agacttacacattcttctccaggctctgcaggctgccttttaggcta<br>ttataggctgaagctctggcttaagatcattgtcaatcagtagtacttg<br>ctaataagagaagcaagcatgaaatgtaataatgaaagatcaatctcc<br>acgtgattataaacactgataacgattttaacatgcctaaccttagaca<br>tgatctctgagatgtcttaaggactgtttatgggatacttggCCATATCCCACTGGAACCGG |          |
| prkar1a_a      | TGTA AACCGACGGCCA GT | GAAGCACAACATCCAGCAGC         | >chr3:36268545+36268910 366bp<br>GCGTCTCTCAGTGTAGACGAAGCACAACATCCAGCAGCGCTCCTCCTCAGTG<br>TAGACctctgcactgatggcaccacggcgccgtcg<br>gccttaaccacagggttcataggaggagagacctcatctcccagaat<br>ctgagcgagagctggactctgctggctcacatctgtttagcctctcc<br>tgattgacataaacaccattcgtggaagtgagacttacttttatgagta<br>tagaaaatgtgaagtgtcaagccatcggttttctctgaagaacac<br>aactgaccaactcaagcttctgaagtagtctctgaggttaagccatgggt<br>ctttcaggcctggcgggtgcacagctgcacaatgcagcttcagcaGCTG<br>CTGGATGTTGTGCTTC                                              |          |
| prkar1a_b      | TGTA AACCGACGGCCA GT | ACCTCAAATGTTACGCGAC          | >chr12:2881060+2881402 343bp CCAAAGTCCAGTTTCACTCAGG<br>ACCTCAAATGTTACGCGACCCAAAGTCCAGTTTCA<br>CTCAGGattaagtcagattacaccagtgagagat<br>gatgtttgtcacaggtgtatgtgaacaatgagtgggcgaccagcattgg<br>cgaggcgagctgtttggagagctggcgttaatctacggcaccggagag<br>ccgccacctcagagccaagaccaactggaagctgtgggcatcgacaga<br>gacagctataggagaatactgatggtacaacatcacctcaacacacacac<br>acgcacactacatttaagtctgtgttcacaccagacgcggaacgcgagg<br>ataaatcgcgctattcgtaaataGTCGCGTGAACATTTGAGGT                                                              | 343      |



## Supplementary figures

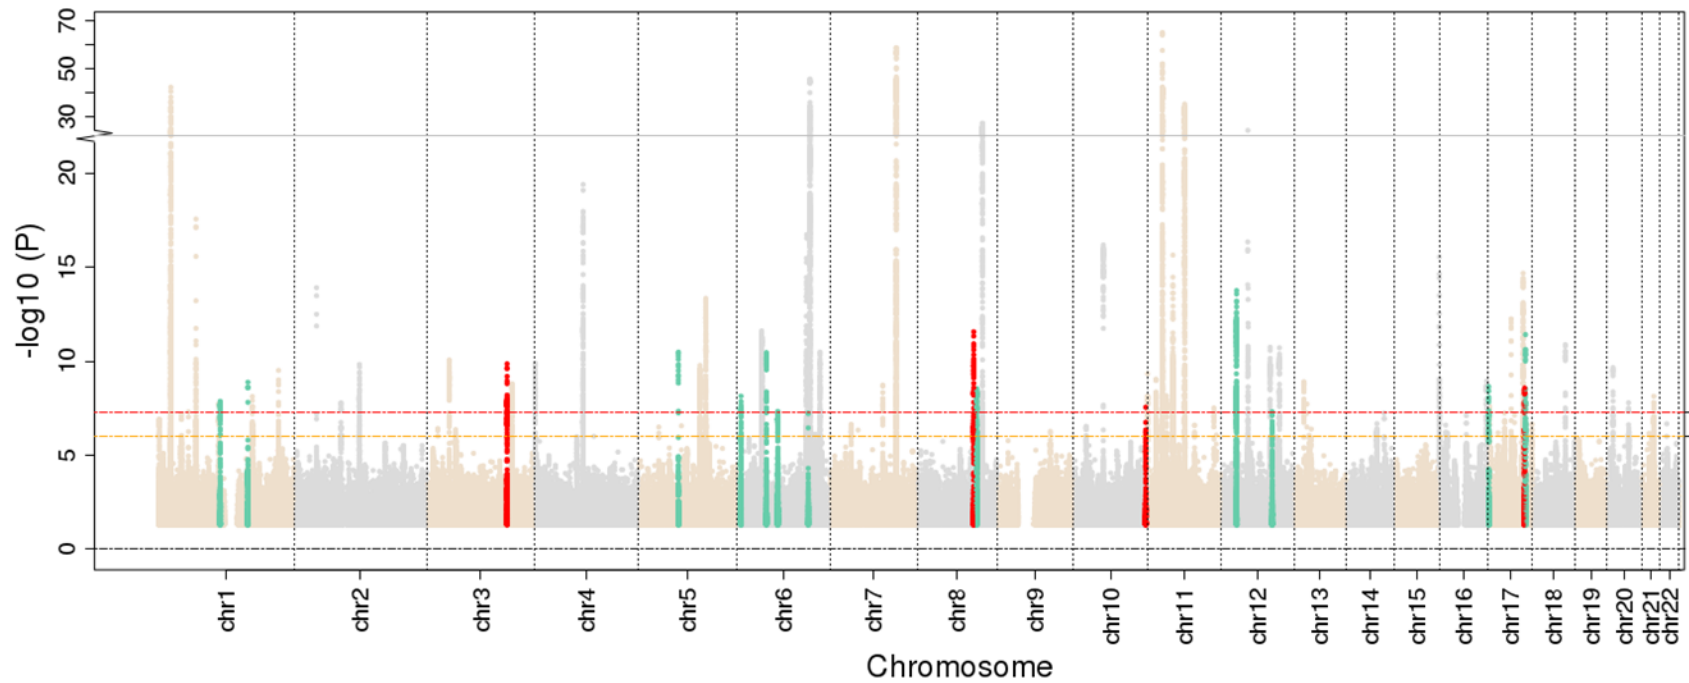

**Supplementary Figure 1. Manhattan Plot SK-BMD Meta-analysis.** Association signals independent from those previously reported for GWAS for DXA/pQCT efforts are presented in aquamarine. BMD association signals in loci not previously reported (so also independent from UKBB ultrasound efforts) are represented by red dots

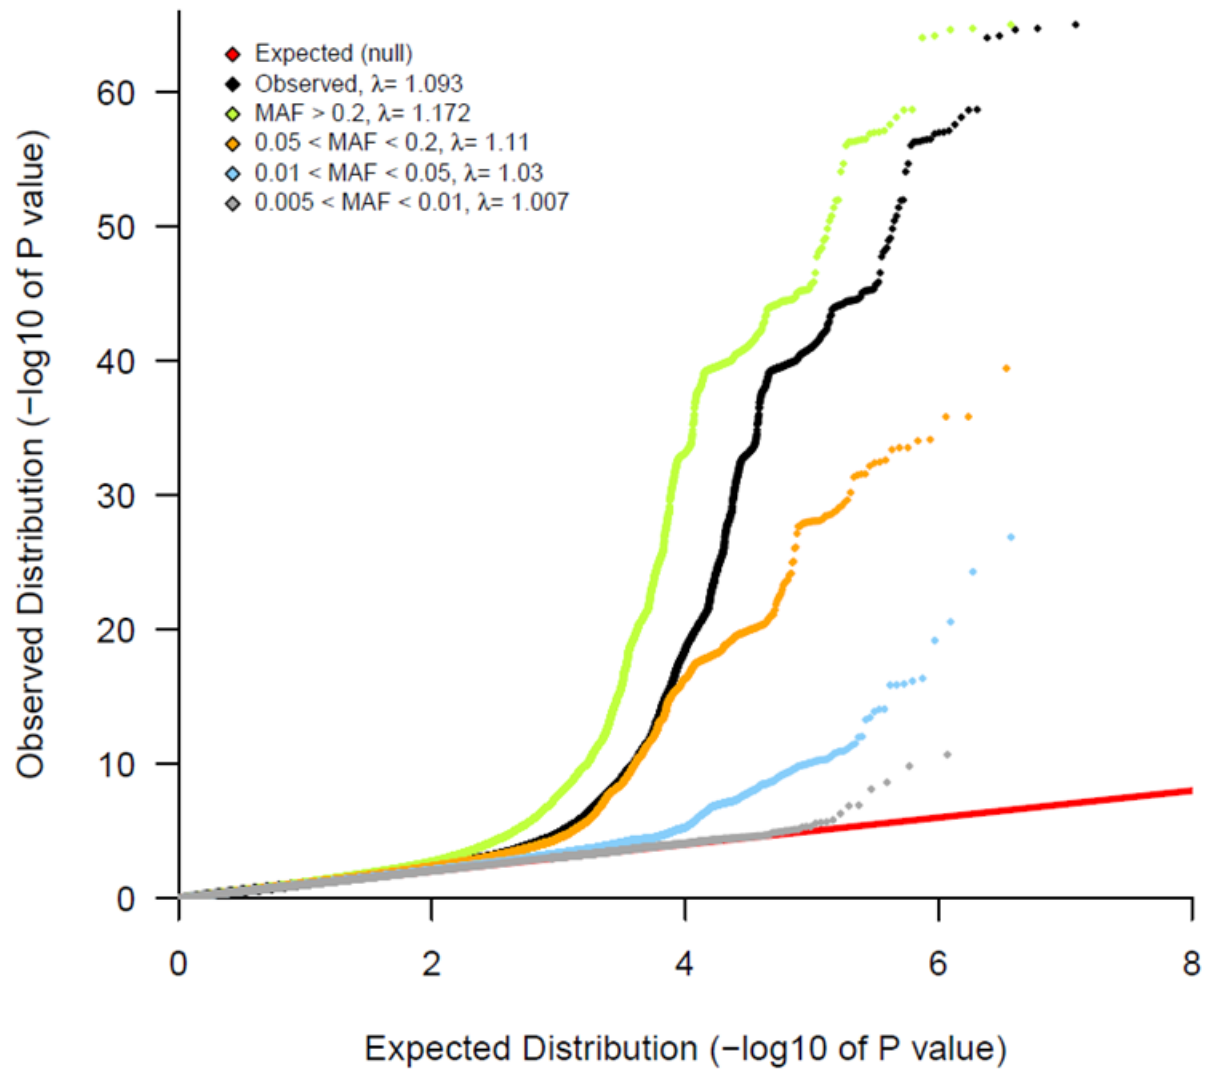

**Supplementary Figure 2.** QQ-Plot for the genome-wide association study of SK-BMD. This plot show the inflation of the test statistics per bin of minor allele frequency

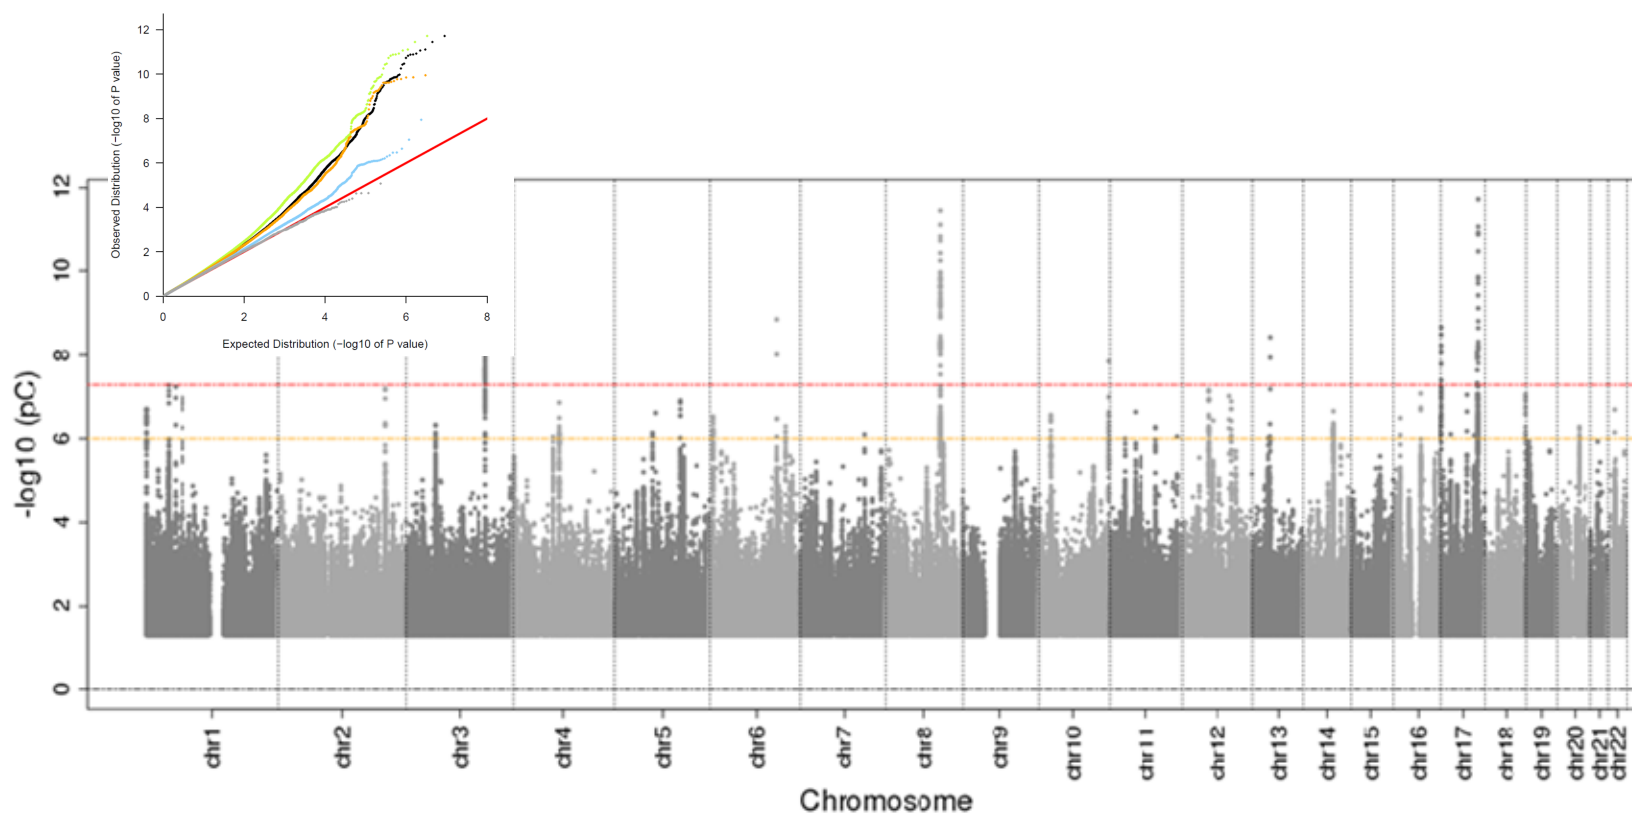

**Supplementary Figure 3. Manhattan and QQ-plots of association statistics ( $-\log_{10}(P \text{ values})$ ) for SK-BMD meta-analysis after conditional analysis on known independent variants.** Each dot represents a SNP and the x-axis indicates its chromosomal position (Build 37 NCBI). Dashed horizontal red and yellow lines mark the GWS threshold ( $P < 5 \times 10^{-8}$ ) and suggestive threshold ( $P < 1 \times 10^{-6}$ ), respectively. Top: QQ-plot showing the inflation of the test statistics per bin of minor allele frequency

PRKAR1A - ILMN\_1738632

"Homo sapiens protein kinase, cAMP-dependent, regulatory, type I, alpha (tissue specific extinguisher 1) (PRKAR1A), transcript variant 3, mRNA."

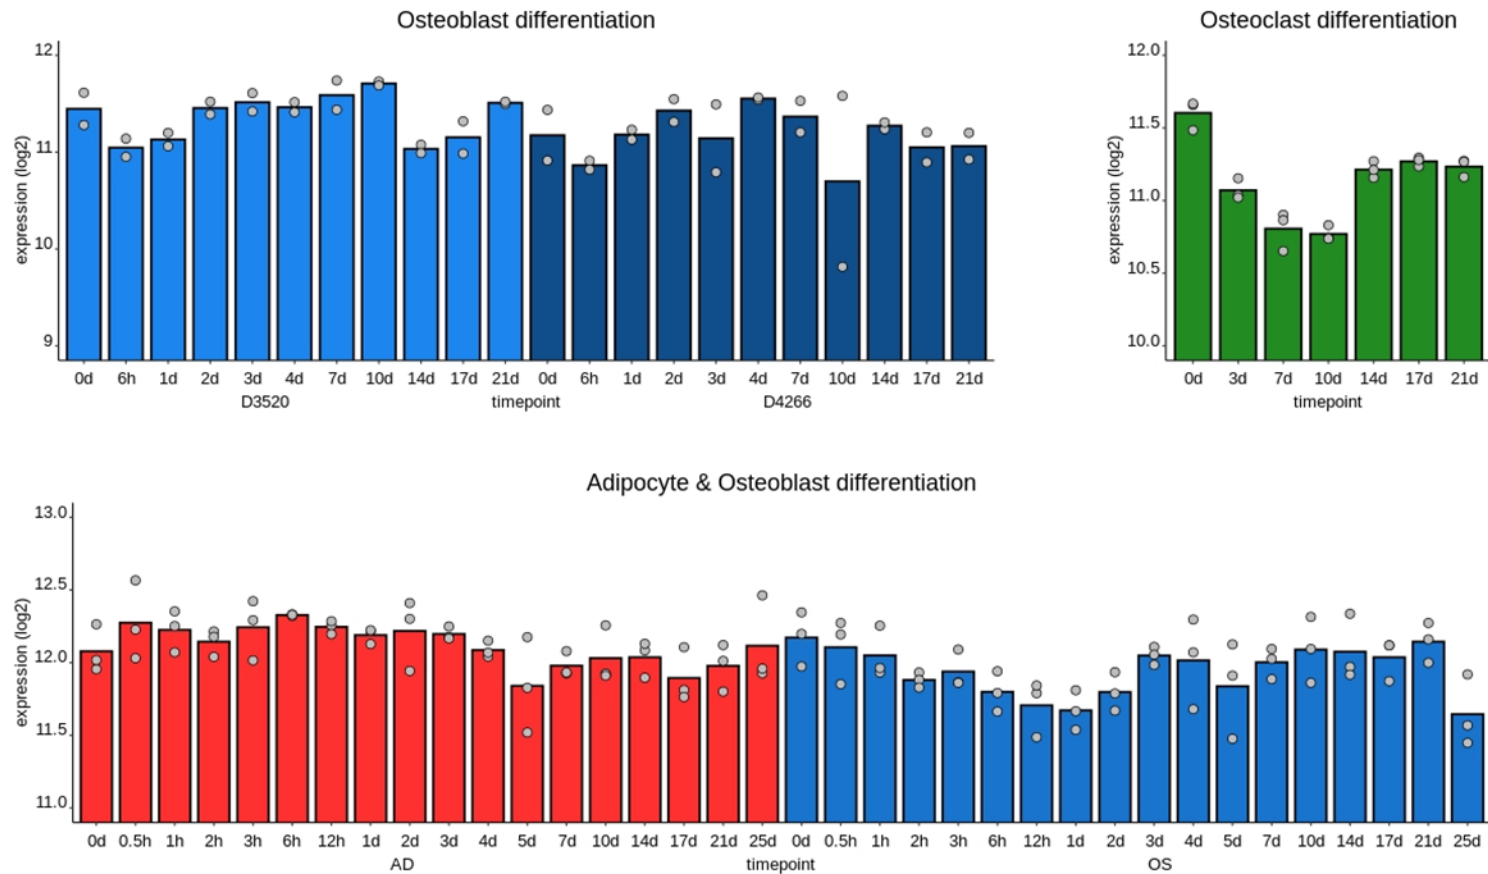

**Supplementary Figure 4. Longitudinal assessment of PRKAR1A expression in human cells. Upper left) Osteoblast differentiation** Bone marrow derived human MSCs from 2 different donors (two replicates per time point) differentiated into Osteoblasts. **Upper right) Osteoclast differentiation** human PBMCs differentiated into Osteoclast from 2 different donors. **Bottom) Adipocyte and Osteoblast differentiation** of Bone marrow derive human MSCs from a single donor (three replicates per time point) .

ATP6V1C1 - ILMN\_1659801

"Homo sapiens ATPase, H+ transporting, lysosomal 42kDa, V1 subunit C1 (ATP6V1C1), mRNA."

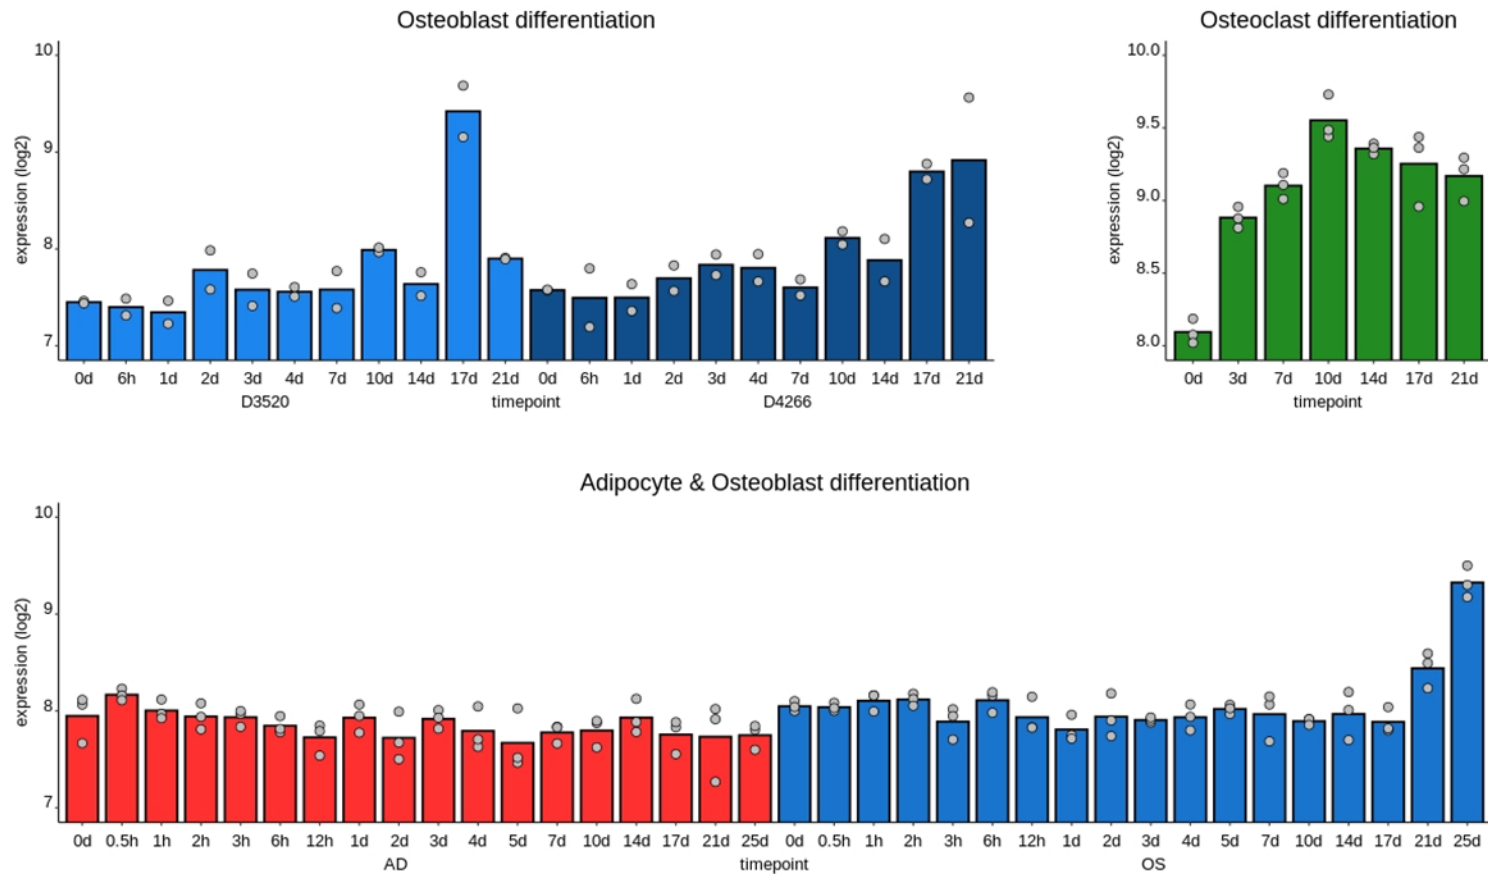

**Supplementary Figure 5. Longitudinal assessment of *ATP6V1C1* expression in human cells. Upper left) Osteoblast differentiation** Bone marrow derived human MSCs from 2 different donors (two replicates per time point) differentiated into Osteoblasts. **Upper right) Osteoclast differentiation** human PBMCs differentiated into Osteoclast from 2 different donors. **Bottom) Adipocyte and Osteoblast differentiation** of Bone marrow derive human MSCs from a single donor (three replicates per time point).

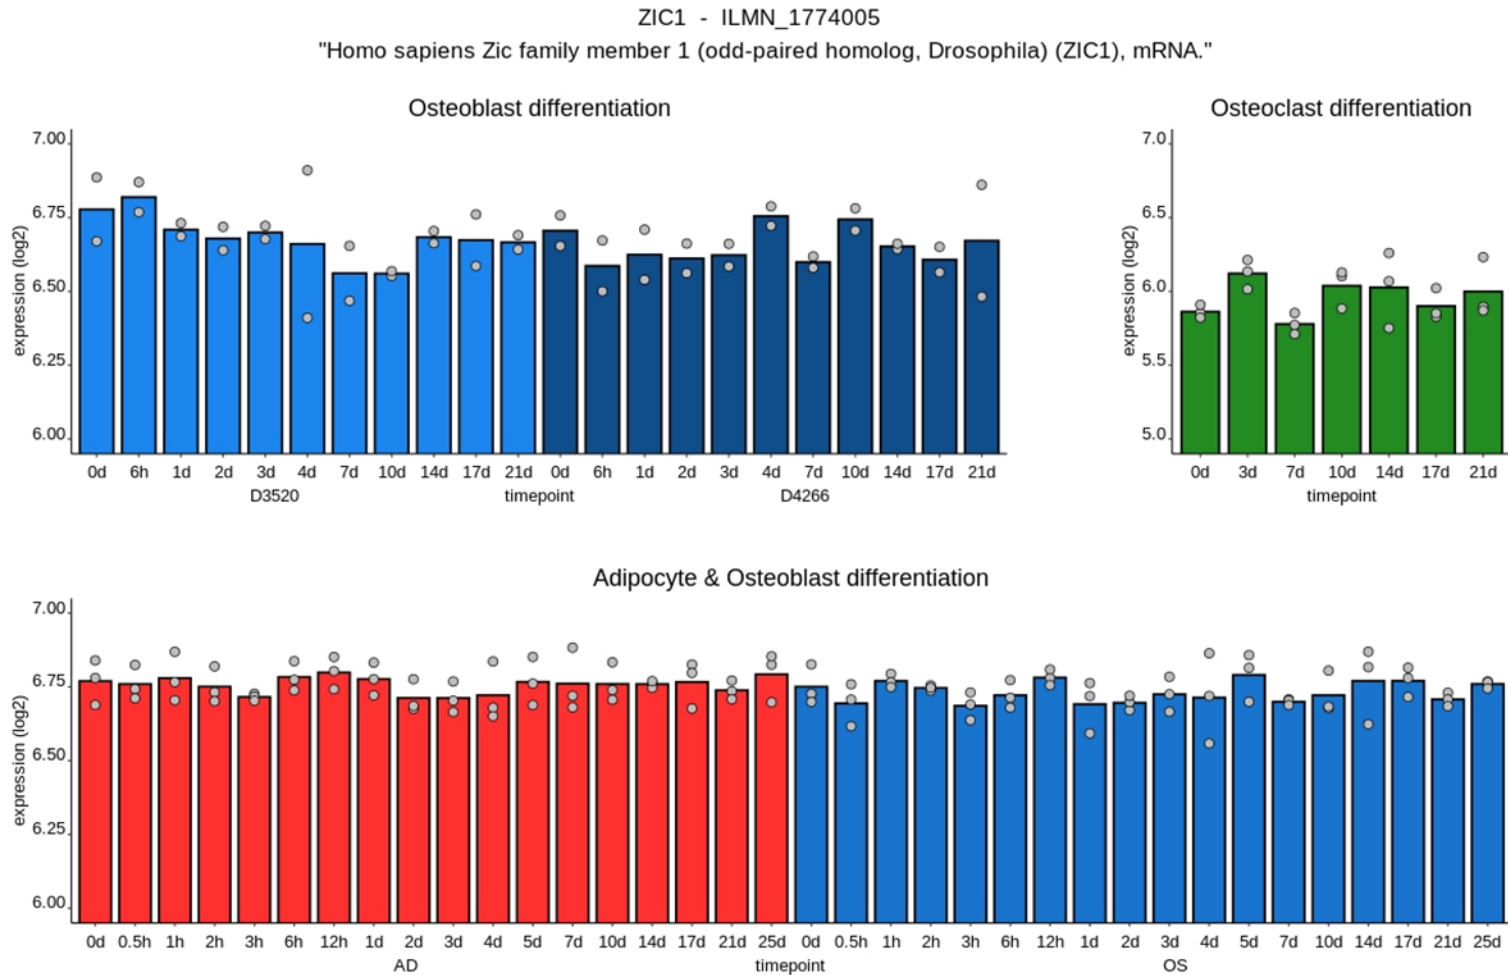

**Supplementary Figure 6. Longitudinal assessment of ZIC1 expression in human cells. Upper left) Osteoblast differentiation** Bone marrow derived human MSCs from 2 different donors (two replicates per time point) differentiated into Osteoblasts. **Upper right) Osteoclast differentiation** human PBMCs differentiated into Osteoclast from 2 different donors. **Bottom) Adipocyte and Osteoblast differentiation** of Bone marrow derive human MSCs from a single donor (three replicates per time point) .

a.

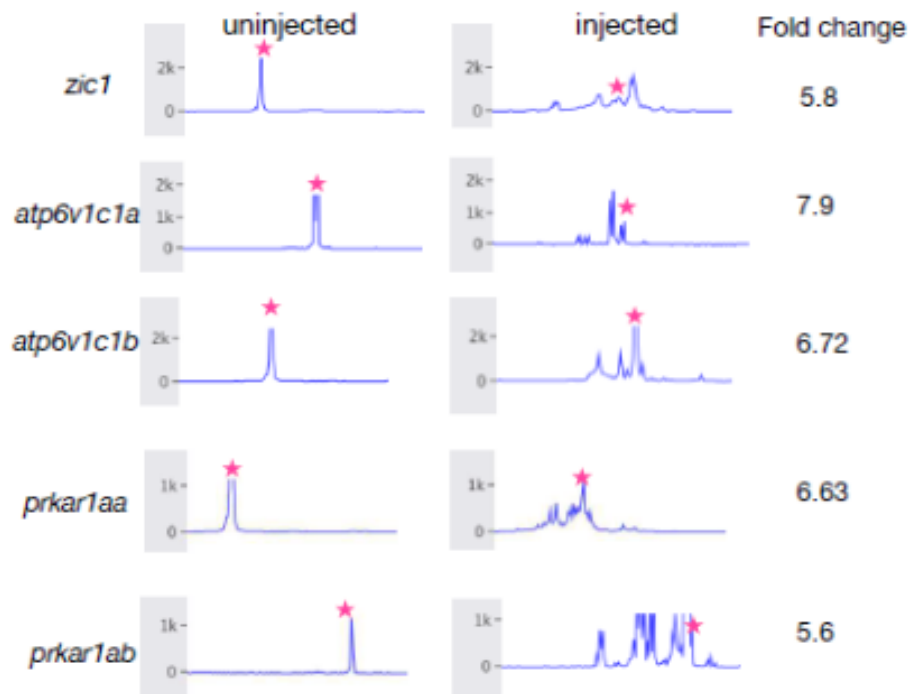

b.

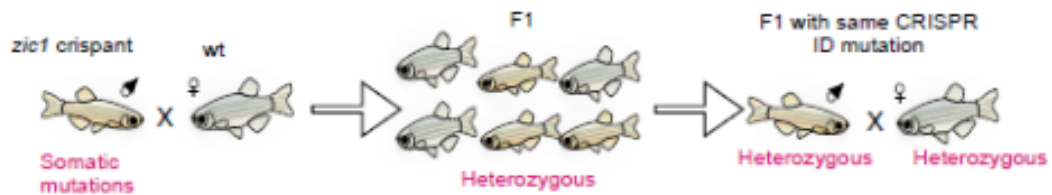

c.

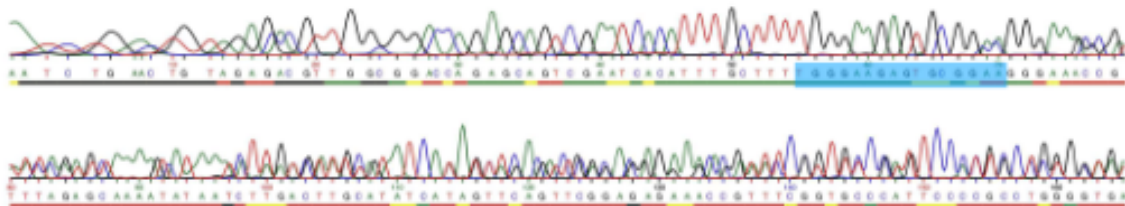

d.

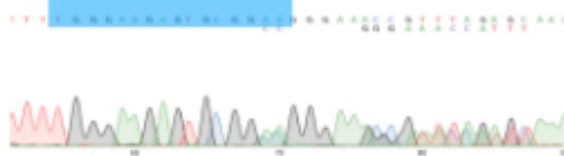

e.

```

100
CGAATCACATTTGCTTTGGGAAGAGTGCGGCCGGGAAGGGAAA 100
-----AGAGTCCG-----AAGGGAAA 17
-----AGAGTGC-----GGAAGGGAAA 17
-----AGAGTCCGGCCGGGAAGGGAAA 22
  
```

f.

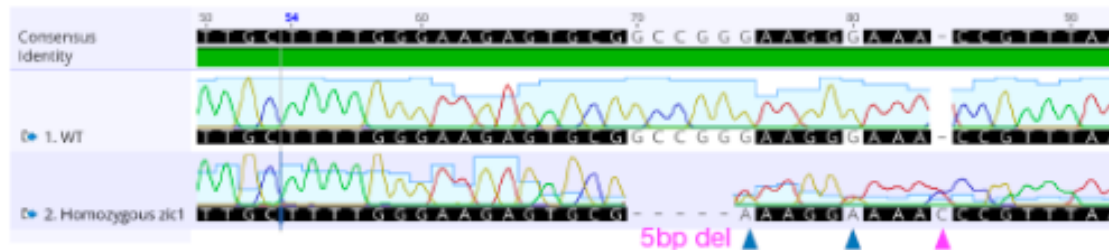

**Supplementary Figure 7. Analysis of the mutagenesis efficiency in crispants and the generation of zic1 homozygous mutants.** **a) Evaluation of CRISPR efficiency.** Amplification peaks for uninjected and injected pools (n=8) are shown for each gene. Red stars show the wt peak. Fold change was calculated by dividing the wt peak between uninjected and injected pools. **b) Generation of zic1 homozygous mutants.** zic1 crispants were crossed to wt to generate F1 (carrying different types of heterozygous mutations). F1 was genotyped using Sanger sequencing and analysed using CRISPR-ID. A pair of F1 carrying the same mutation were crossed to generate F2. **c) Sanger sequencing of F1 fish.** Blue square highlights a region targeted by two gRNAs. d and e) CRISPR-ID analysis showing the alignment between a reference control and F1. A pair of fish with the same mutation were crossed to generate zic1 homozygous mutants (F2). **e) CRISPR-ID analysis of one F1 sequence** (fish with asymmetrical caudal fin), predicting 5bp deletions. **f) Sequence alignment (Geneious) of a wt and a zic1 homozygous mutant.** Note the confirmation of a deletion of 5bp, two mismatches (blue arrowheads) and an insertion of a base pair (magenta arrowhead). These mutations lead to truncation of the zic1 protein, reducing protein length from 442aa to 283aa.



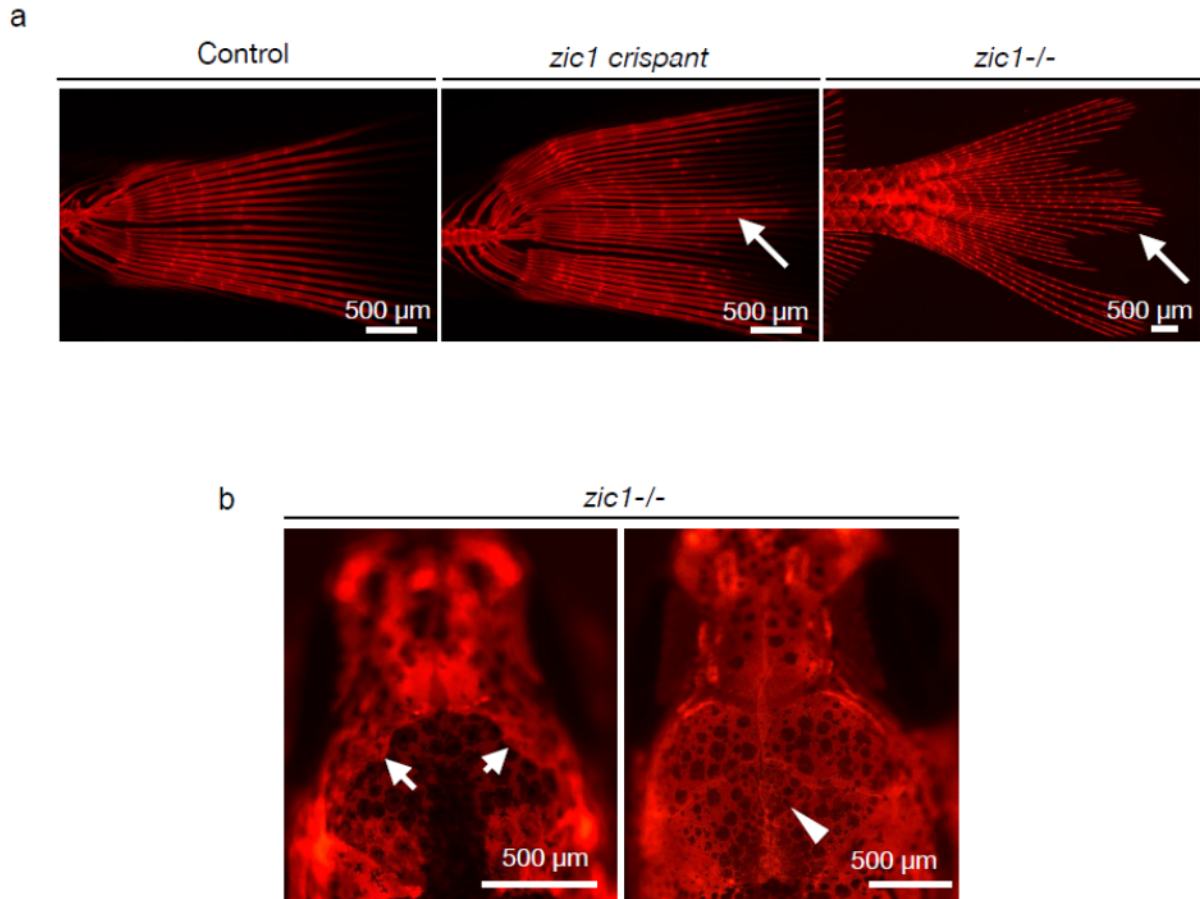

**Supplementary Figure 8. Zebrafish *zic1* homozygous mutants show similar phenotypes as crispants. a) Asymmetrical caudal fin phenotype** was found among crispants, a persistent trait in homozygous mutants. Asymmetrical caudal fin phenotype was detected in 13/55 (24%) zebrafish. **b) *zic1* homozygous mutants phenotype.** *Zic1* homozygous mutants showed a delay in skull formation, with uneven bone growth (arrows), that can culminate in ectopic suture (arrowhead), like in crispants. While skull phenotype was not detected in any zebrafish with normal fins, all zebrafish with abnormal caudal fins showed irregular cranial bone growth. Scale bars are indicated in each figure.

## Supplementary references

1. Boyd, A. *et al.* Cohort Profile: the 'children of the 90s'--the index offspring of the Avon Longitudinal Study of Parents and Children. *Int J Epidemiol* **42**, 111-27 (2013).
2. Fraser, A. *et al.* Cohort Profile: the Avon Longitudinal Study of Parents and Children: ALSPAC mothers cohort. *Int J Epidemiol* **42**, 97-110 (2013).
3. Northstone, K. *et al.* The Avon Longitudinal Study of Parents and Children (ALSPAC): an update on the enrolled sample of index children in 2019 [version 1; peer review: 2 approved]. *Wellcome Open Research* **4**(2019).
4. Kemp, J.P. *et al.* Phenotypic dissection of bone mineral density reveals skeletal site specificity and facilitates the identification of novel loci in the genetic regulation of bone mass attainment. *PLoS Genet* **10**, e1004423 (2014).
5. Kalkwarf, H.J. *et al.* The bone mineral density in childhood study: bone mineral content and density according to age, sex, and race. *J Clin Endocrinol Metab* **92**, 2087-99 (2007).
6. Zemel, B.S. *et al.* Revised reference curves for bone mineral content and areal bone mineral density according to age and sex for black and non-black children: results of the bone mineral density in childhood study. *J Clin Endocrinol Metab* **96**, 3160-9 (2011).
7. van Wijngaarden, J.P. *et al.* Rationale and design of the B-PROOF study, a randomized controlled trial on the effect of supplemental intake of vitamin B12 and folic acid on fracture incidence. *BMC Geriatr* **11**, 80 (2011).
8. Bisgaard, H. The Copenhagen Prospective Study on Asthma in Childhood (COPSAC): design, rationale, and baseline data from a longitudinal birth cohort study. *Ann Allergy Asthma Immunol* **93**, 381-9 (2004).
9. Ahluwalia, T.S. *et al.* FUT2-ABO epistasis increases the risk of early childhood asthma and Streptococcus pneumoniae respiratory illnesses. *Nat Commun* **11**, 6398 (2020).
10. Bisgaard, H. *et al.* Deep phenotyping of the unselected COPSAC2010 birth cohort study. *Clin Exp Allergy* **43**, 1384-94 (2013).
11. Stykarsdottir, U. *et al.* Nonsense mutation in the LGR4 gene is associated with several human diseases and other traits. *Nature* **497**, 517-20 (2013).
12. Kooijman, M.N. *et al.* The Generation R Study: design and cohort update 2017. *Eur J Epidemiol* **31**, 1243-1264 (2016).
13. Medina-Gomez, C. *et al.* Challenges in conducting genome-wide association studies in highly admixed multi-ethnic populations: the Generation R Study. *Eur J Epidemiol* **30**, 317-30 (2015).
14. Lorentzon, M., Mellstrom, D. & Ohlsson, C. Age of attainment of peak bone mass is site specific in Swedish men--The GOOD study. *J Bone Miner Res* **20**, 1223-7 (2005).
15. Orwoll, E. *et al.* Design and baseline characteristics of the osteoporotic fractures in men (MrOS) study--a large observational study of the determinants of fracture in older men. *Contemp Clin Trials* **26**, 569-85 (2005).
16. Blank, J.B. *et al.* Overview of recruitment for the osteoporotic fractures in men study (MrOS). *Contemp Clin Trials* **26**, 557-68 (2005).

17. Viitasalo, A. *et al.* The effects of a 2-year individualized and family-based lifestyle intervention on physical activity, sedentary behavior and diet in children. *Prev Med* **87**, 81-8 (2016).
18. Newnham, J.P., Evans, S.F., Michael, C.A., Stanley, F.J. & Landau, L.I. Effects of frequent ultrasound during pregnancy: a randomised controlled trial. *Lancet* **342**, 887-91 (1993).
19. Straker, L. *et al.* Cohort Profile: The Western Australian Pregnancy Cohort (Raine) Study-Generation 2. *Int J Epidemiol* (2017).
20. Hofman, A. *et al.* The Rotterdam Study: 2016 objectives and design update. *Eur J Epidemiol* **30**, 661-708 (2015).
21. Cummings, S.R. *et al.* Appendicular bone density and age predict hip fracture in women. The Study of Osteoporotic Fractures Research Group. *JAMA* **263**, 665-8 (1990).
22. Yang, J. *et al.* Conditional and joint multiple-SNP analysis of GWAS summary statistics identifies additional variants influencing complex traits. *Nature Genetics* **44**, 369-U170 (2012).
23. Zheng, H.F. *et al.* Whole-genome sequencing identifies EN1 as a determinant of bone density and fracture. *Nature* **526**, 112-7 (2015).
24. Morris, J.A. *et al.* An atlas of genetic influences on osteoporosis in humans and mice. *Nat Genet* **51**, 258-266 (2019).
25. Westra, H.J. *et al.* Systematic identification of trans eQTLs as putative drivers of known disease associations. *Nat Genet* **45**, 1238-1243 (2013).
