# Supplementary material for: Bone mineral density loci specific to the skull portray potential pleiotropic effects on craniosynostosis
Source: PubMed Central journal article supplement (PMC10319806; doi:10.1038/s42003-023-04869-0), 2023-07-04
Supplement: 42003_2023_4869_MOESM3_ESM.pdf [file 42003_2023_4869_MOESM3_ESM.pdf]

## Description of Additional Supplementary Files

**File name:** Supplementary Data 1

**Description:** Genotyping, Phenotyping and analysis description per cohort

**File name:** Supplementary Data 2

**Description:** Participant descriptions per cohort

**File name:** Supplementary Data 3

**Description:** Regional plots for all GWS loci

**File name:** Supplementary Data 4

**Description:** Lookup of all known independent markers associated with bone phenotypes.

**File name:** Supplementary Data 5

**Description:** GARFIELD analyses, source data for Figure 2

**File name:** Supplementary Data 6

**Description:** DEPICT enrichment analyses, source data for Figure 3b.

**File name:** Supplementary Data 7

**Description:** Relevance of SK-BMD implicated genes across mice and human datasets.
